# Supplementary material for: Normal breast tissue DNA methylation differences at regulatory elements are associated with the cancer risk factor age
Source: Breast Cancer Res. 2017 Jul 10;19:81. doi: 10.1186/s13058-017-0873-y (PMC5504720; doi:10.1186/s13058-017-0873-y)
Supplement: Supplementary file 3 — Age-related CpGs and genomic annotation. (XLSX 169 kb) [file 13058_2017_873_MOESM3_ESM.xlsx]

## Sheet: Age-Related-CpGs-Annotated.csv
Illumina CG ID	Chromosome	Genomic Location (hg19)	Gene	Region	CpG Island status	Age P-value	BMI P-value	Parity P-value	Age Coefficient	BMI Coefficient	Parity Coefficient
cg00008621	14	62179983	HIF1A	Body	OpenSea	1.43966e-08	0.643375	0.0160008	0.0138512	-0.00142158	-0.123226
cg00017271	17	76220743	BIRC5	3'UTR	OpenSea	7.76127e-06	0.617721	0.846484	-0.0105461	0.00152981	0.00973543
cg00025981	13	42031281	C13orf15	TSS1500	Island	9.51866e-07	0.825705	0.0929043	0.0124873	-0.000720762	-0.0909377
cg00036976	16	85343281	NA	NA	OpenSea	4.94806e-06	0.73597	0.465717	-0.00670316	0.000641492	0.0228039
cg00044665	16	66400411	CDH5	TSS200	OpenSea	1.4961e-05	0.0753205	0.130051	-0.00822748	-0.00444228	0.0619232
cg00045787	16	69318027	SNTB2	Body	OpenSea	6.86517e-07	0.390997	0.156767	0.00907019	0.0020133	-0.0547353
cg00048759	7	99775422	STAG3	TSS200	Island	2.24661e-05	0.536393	0.476239	0.00892206	0.0017014	-0.0321872
cg00054890	7	98632054	SMURF1	Body	Shore	2.48654e-06	0.364208	0.0924192	0.00925792	0.00230808	-0.0706352
cg00065935	3	120627088	STXBP5L	1stExon	Island	1.44692e-06	0.765268	0.864052	0.00966392	-0.000771087	0.00725693
cg00066663	17	7792674	CHD3	Body	Shelf	3.92558e-07	0.422017	0.05382	-0.0131618	-0.00266807	0.106037
cg00067720	5	67521141	PIK3R1	TSS1500	OpenSea	7.97848e-06	0.172311	0.580632	-0.00986787	-0.00393701	0.0260503
cg00068155	3	131754131	CPNE4	TSS1500	Island	1.99994e-05	0.204791	0.406146	0.0126623	0.00493499	0.0529367
cg00088042	10	103892309	PPRC1	TSS1500	Shore	4.23034e-09	0.77569	0.910492	0.0241499	0.00146152	-0.00946289
cg00160359	12	49178192	ADCY6	5'UTR	Shore	1.10819e-05	0.686526	0.000340333	0.01115	0.00133292	-0.200922
cg00197026	6	11537105	TMEM170B	TSS1500	Shore	7.63956e-06	0.352417	0.0234623	-0.0130648	0.00353395	0.142954
cg00220102	16	8806756	ABAT	5'UTR	OpenSea	1.07791e-05	0.877248	0.0575061	0.00887187	0.000405148	-0.0825618
cg00221745	10	104179478	FBXL15	TSS200	Island	2.54563e-09	0.931679	0.0182452	0.0151025	-0.000270335	-0.124002
cg00257455	1	65530538	NA	NA	Shore	2.11485e-05	0.166249	0.714403	-0.0105732	-0.00451709	-0.019507
cg00270654	16	87735724	LOC100129637	Body	Shore	2.59271e-06	0.806667	0.400745	0.0106456	0.000715825	-0.040412
cg00344202	11	71258392	KRTAP5-9	TSS1500	OpenSea	3.60684e-06	0.457249	0.0818307	0.0157042	0.00326454	-0.126261
cg00367047	9	139159108	NA	NA	Shore	4.85433e-06	0.999175	0.0658553	0.0146628	4.29753e-06	-0.126616
cg00394316	7	22539822	MGC87042	5'UTR	Island	1.84973e-06	0.475371	0.595439	0.027984	0.00540606	0.0659699
cg00401972	16	66400404	CDH5	TSS200	OpenSea	3.45777e-08	0.00405653	0.131868	-0.0105997	-0.00712298	0.0603285
cg00431673	8	12974448	DLC1	Body	OpenSea	1.55204e-07	0.10803	0.179801	0.0195661	0.00767728	-0.104959
cg00460776	12	120731287	NA	NA	OpenSea	7.64103e-07	0.101341	0.640979	0.0192703	0.00825141	0.0382977
cg00464814	6	16758889	ATXN1	5'UTR	Shore	1.20412e-07	0.187432	0.0713072	-0.0128399	-0.00408127	0.0920225
cg00471645	2	11270192	NA	NA	OpenSea	8.84632e-08	0.796901	0.946868	0.0138934	-0.000847954	-0.00360339
cg00481951	3	187387650	SST	Body	Shore	6.43605e-06	0.571187	0.185287	0.015272	-0.00248954	0.0959484
cg00489219	3	40566141	ZNF621	TSS1500	Island	1.38527e-05	0.773547	0.429946	0.0108221	-0.000933615	0.0420959
cg00503302	3	62355319	NA	NA	Island	3.61462e-06	0.433571	0.232538	0.0154176	0.00337708	0.0846885
cg00516222	17	27949795	CORO6	TSS1500	Island	2.01682e-09	0.602131	0.0268256	0.014406	-0.00155727	-0.1099
cg00530564	12	125036429	NA	NA	Shelf	7.84148e-06	0.801371	0.0816234	-0.0140712	0.00102894	0.117829
cg00533183	6	32810742	PSMB8	Body	Shore	1.5733e-05	0.687796	0.0407503	0.0134787	-0.0016359	-0.13819
cg00590036	6	158957433	TMEM181	TSS200	Island	2.30431e-09	0.73987	0.144024	0.0208401	0.00144038	-0.104591
cg00620976	16	65612895	NA	NA	OpenSea	3.71557e-06	0.516607	0.00253996	0.0117268	-0.00212928	-0.16648
cg00643222	5	88866084	NA	NA	OpenSea	7.12298e-06	0.442947	0.0752108	0.0178052	-0.00395606	-0.151617
cg00664406	3	51740875	GRM2	TSS1500	Island	3.97262e-06	0.538009	0.787773	0.0130871	0.00226359	-0.0162286
cg00684075	2	85969661	NA	NA	OpenSea	9.35922e-07	0.136922	0.25149	-0.01371	0.00537148	0.0678144
cg00702638	3	44803293	KIF15	1stExon	Island	9.75683e-18	0.999013	0.140874	0.0465278	-7.47769e-06	-0.146904
cg00718470	15	98964982	NA	NA	Island	1.28159e-07	0.0704565	0.951841	0.0199609	0.00876425	0.00476136
cg00743094	13	100547968	CLYBL	3'UTR	Island	1.63522e-13	0.886985	0.630405	0.0254241	0.000577432	0.0321061
cg00785193	2	36582293	CRIM1	TSS1500	Shore	1.09717e-05	0.869791	0.0376138	-0.011875	-0.000576081	0.121305
cg00830621	16	18799106	RPS15A	Body	Shelf	1.92698e-05	0.839896	0.00154819	0.0125148	0.00077223	-0.203977
cg00864666	2	173850250	RAPGEF4	Body	OpenSea	1.85426e-05	0.047809	0.103227	-0.00604617	-0.00368446	0.0496246
cg00950497	10	116393423	ABLIM1	Body	Shore	9.9208e-06	0.000377604	0.659037	-0.0109649	-0.0118682	-0.0233842
cg01004363	10	88729464	AGAP11	TSS1500	Shore	8.53165e-06	0.521777	0.0416705	-0.00796436	0.00149105	0.0785921
cg01054354	15	100272751	LYSMD4	5'UTR	Shore	9.43477e-07	0.46402	0.0178896	-0.0123188	-0.00236643	0.127316
cg01094748	8	38645271	TACC1	Body	Island	4.18212e-06	0.906077	0.853344	0.0148382	-0.000492518	0.0126662
cg01102833	4	176986621	WDR17	TSS1500	Shore	2.10511e-05	0.465536	0.490894	-0.00802667	-0.00180057	-0.0278948
cg01122755	6	44281249	AARS2	TSS200	Shore	1.03992e-13	0.015669	0.981607	0.0224682	0.00871859	-0.00134423
cg01141812	6	123317124	CLVS2	TSS1500	Shore	3.54344e-06	0.795664	0.354121	0.0109226	-0.00078925	0.0464523
cg01168339	12	120935726	DYNLL1	Body	Shore	2.29913e-06	0.0893305	0.00909516	0.0134975	0.00631126	-0.160725
cg01202666	7	19157650	TWIST1	TSS1500	Island	3.1111e-06	0.84598	0.988602	0.0135246	0.000728279	0.000879012
cg01211097	16	84732969	USP10	TSS1500	Shore	2.90542e-06	0.0714475	0.126284	-0.00664266	0.00333658	0.0463384
cg01221157	16	8807011	ABAT	5'UTR	OpenSea	2.29494e-05	0.0953962	0.0260315	0.0198299	0.0102772	-0.22646
cg01245155	2	205919517	PARD3B	Body	OpenSea	1.75691e-06	0.644535	0.0252098	0.014611	0.00181861	-0.146671
cg01259029	5	10564690	ANKRD33B	1stExon	Island	4.40949e-06	0.803619	0.329324	0.0123312	-0.00086505	0.0558316
cg01271695	2	1719323	PXDN	Body	OpenSea	8.53925e-10	0.0994012	0.00447178	-0.0112479	-0.0037631	0.108105
cg01272428	2	74477456	SLC4A5	Body	OpenSea	6.15819e-06	0.0583132	0.884735	0.0159629	0.00875552	-0.0109001
cg01281911	1	47882686	FOXE3	1stExon	Island	2.14931e-05	0.985043	0.725391	0.0278183	0.000160269	0.0493083
cg01300684	4	141230118	SCOC	5'UTR	OpenSea	1.01572e-05	0.294664	2.15217e-05	0.00712413	0.00220643	-0.153687
cg01322214	7	25219198	C7orf31	5'UTR	Shore	4.39339e-07	0.236746	0.0362574	-0.0104073	0.00313014	0.0916577
cg01428589	19	33167718	RGS9BP	1stExon	Island	2.13439e-05	0.993372	0.66136	0.0239621	-6.1151e-05	0.0529536
cg01441777	22	38714416	CSNK1E	TSS1500	Shore	3.17988e-06	0.463568	0.11163	-0.00936506	-0.00190749	0.0683167
cg01447660	2	69152678	NA	NA	OpenSea	2.44527e-07	0.739486	0.423697	-0.0155313	0.00127631	0.0504715
cg01486610	8	42749175	RNF170	5'UTR	Shelf	7.19187e-07	0.00125319	0.00154966	-0.0158731	-0.0136281	0.219212
cg01556706	3	59804435	FHIT	Body	OpenSea	1.28506e-05	0.725888	0.187899	-0.0188504	-0.00197346	0.122184
cg01637011	1	200992964	KIF21B	TSS200	Shore	1.54827e-05	0.779772	0.732792	0.011879	0.00100208	0.0200854
cg01644850	19	58193231	ZNF551	TSS200	Shore	1.79361e-09	0.635527	0.217913	0.0226648	0.00221864	-0.0949932
cg01657995	6	31804883	C6orf48	5'UTR	Shelf	2.17332e-05	0.166282	0.848156	0.00732784	0.00313531	-0.007083
cg01726767	12	48965123	LALBA	TSS1500	OpenSea	1.6649e-05	0.160205	0.0616097	0.0107524	0.00459741	-0.10084
cg01754756	10	88728078	C10orf116	TSS200	Island	1.49598e-06	0.259439	0.00240218	-0.0165531	-0.00501214	0.226192
cg01837410	5	101631990	SLCO4C1	1stExon	Shore	8.80438e-07	0.697926	0.876975	0.0142476	-0.00144469	0.00945494
cg01844642	3	51989764	GPR62	1stExon	Island	5.02917e-07	0.0317663	0.995211	0.00637276	0.00352914	-0.000159927
cg01881062	1	6660403	KLHL21	Body	Shore	1.16762e-05	0.109235	0.654141	-0.00949862	-0.00454824	0.0207519
cg01902066	16	50727242	NA	NA	OpenSea	5.7794e-08	0.213481	0.02298	-0.0152759	-0.00445049	0.13481
cg01908954	15	51973764	SCG3	5'UTR	Island	4.83416e-08	0.16229	0.506126	0.0200029	0.00650865	0.050627
cg01942023	2	189837928	COL3A1	TSS1500	OpenSea	5.25509e-06	0.243415	0.17826	0.0107156	0.00357032	-0.0677091
cg01968525	11	46575582	AMBRA1	5'UTR	OpenSea	6.63097e-06	0.163971	0.00444773	-0.0173471	-0.00699086	0.238402
cg01981354	8	42748651	RNF170	5'UTR	Shelf	2.40105e-06	0.70169	0.166003	-0.0103566	-0.00108616	0.0647751
cg02010481	7	28218524	JAZF1	Body	Shore	1.6308e-05	0.653122	0.0483943	-0.0102821	0.00139868	0.101826
cg02071825	17	56833096	PPM1E	TSS200	Island	1.60924e-05	0.833786	0.329783	0.0114793	-0.000728261	-0.0556471
cg02078525	16	66400395	CDH5	TSS200	OpenSea	4.20817e-06	0.157321	0.17928	-0.00916103	-0.00366491	0.0570987
cg02118776	6	44281222	AARS2	TSS200	Shore	1.40315e-05	0.550492	0.441536	0.00938119	0.00168164	-0.0356036
cg02119840	7	150020900	ACTR3C	TSS200	Shore	5.69224e-06	0.0261846	0.0291156	-0.0137342	0.00884255	0.14236
cg02171859	7	853441	NA	NA	Shore	1.62288e-06	0.00866792	0.389188	-0.00726607	-0.00521826	0.0276411
cg02189888	19	46582065	NA	NA	Island	1.72232e-05	0.367271	0.693337	0.00917023	0.00251428	0.0180185
cg02210498	22	21275401	CRKL	Body	Shelf	7.24061e-07	0.40289	0.113176	0.0147397	0.00319762	-0.0998747
cg02228185	17	3379567	ASPA	1stExon	OpenSea	6.74922e-07	0.456986	0.886888	-0.0119986	-0.00230654	0.00722981
cg02232208	3	147137147	NA	NA	Island	2.43234e-07	0.230183	0.391865	0.0132603	0.00394495	0.0461207
cg02245832	6	170784959	NA	NA	Shelf	9.57359e-07	0.037161	0.0166975	0.014539	0.008035	-0.152023
cg02272429	15	25756044	NA	NA	OpenSea	8.85994e-06	0.176759	0.00200705	0.0124255	0.00493357	-0.18906
cg02275294	1	179262462	SOAT1	TSS1500	Shore	1.54706e-06	0.0526203	0.407066	-0.0141402	-0.00741845	0.0516668
cg02308914	3	129290549	PLXND1	Body	OpenSea	1.28155e-05	0.0712696	0.00127804	0.00810774	0.00440271	-0.131529
cg02315870	7	26236721	HNRNPA2B1	Body	Shelf	1.27607e-05	0.0756324	0.0479378	0.00675315	0.00361015	-0.0661044
cg02316506	3	42694803	ZBTB47	TSS1500	Shore	6.35276e-07	0.433778	0.988686	-0.00774242	-0.00156229	-0.000463831
cg02328239	5	37837463	GDNF	5'UTR	Island	2.03016e-05	0.48044	0.529372	0.0109727	0.00237472	-0.0347359
cg02331561	16	2391081	ABCA17P	Body	Island	6.22692e-15	0.410436	0.155587	0.0266768	0.00326257	-0.0927174
cg02361903	1	110452616	CSF1	TSS1500	Shore	3.50991e-07	0.0452459	0.815804	-0.00855028	-0.00434053	0.00820161
cg02375320	2	38978881	SFRS7	TSS1500	Shore	5.40756e-07	0.705023	0.0594837	0.0198966	-0.00192553	-0.158781
cg02383785	7	127808848	NA	NA	Island	1.77519e-10	0.379035	0.264527	0.0234235	0.00396759	0.0827047
cg02426178	19	10747142	SLC44A2	Body	Island	4.37493e-08	0.617793	0.95424	-0.00583754	0.000672638	-0.00126885
cg02462661	15	74275622	STOML1	3'UTR	OpenSea	1.78194e-06	0.00778402	0.0751828	-0.0106855	-0.00781892	0.0849141
cg02479575	19	4769653	MIR7-3	TSS1500	OpenSea	1.58805e-05	0.626095	0.735885	0.00956703	0.00140888	-0.0160043
cg02500392	6	138539372	PBOV1	1stExon	OpenSea	6.85447e-06	0.0412987	0.407759	0.0139838	-0.00832552	-0.0549304
cg02503376	17	7283817	TNK1	TSS1500	Shore	7.9184e-06	0.0166194	0.15301	-0.00912363	-0.00645149	0.0625619
cg02516101	22	38711891	CSNK1E	5'UTR	Shore	1.34979e-06	0.642753	0.00834423	-0.015229	0.00188233	0.178888
cg02519751	3	147126753	ZIC1	TSS1500	Shore	4.60086e-06	0.176647	0.165231	0.0197788	0.00759091	-0.128001
cg02525989	3	186211511	NA	NA	OpenSea	9.75358e-06	0.578223	0.00210551	0.0191042	0.00312569	-0.29077
cg02676865	10	99259738	MMS19	TSS1500	Shore	2.34153e-06	0.624097	0.00241608	-0.0141917	-0.00190235	0.197983
cg02721182	6	28805254	NA	NA	Shore	4.12537e-07	0.222088	0.0946502	0.0138403	0.00428515	0.0966142
cg02744888	15	68778120	NA	NA	OpenSea	5.04426e-07	0.00750826	0.0470907	0.0127281	0.00883641	-0.106798
cg02748419	3	141868612	NA	NA	Island	4.95606e-07	0.17361	0.75236	0.013049	0.00454263	0.01721
cg02781618	4	42153695	BEND4	Body	Island	1.1658e-07	0.148709	0.81326	0.0164348	0.00572078	-0.0152774
cg02821342	7	130793551	MKLN1	TSS1500	Shore	1.6814e-08	4.79744e-05	0.211086	-0.0207061	-0.0196051	0.0950847
cg02834765	1	155214859	GBA	TSS1500	OpenSea	2.0039e-06	0.835225	0.00139516	-0.0121932	-0.000688219	0.178334
cg02927747	18	60381593	PHLPP1	TSS1500	Shore	8.29674e-06	0.0504407	0.855621	-0.0144531	0.00832572	-0.0125833
cg02943595	10	114610560	LOC143188	TSS200	OpenSea	2.12326e-05	0.662682	0.075573	0.00578453	0.000775319	-0.0522518
cg03020208	12	50354962	AQP5	TSS1500	Island	3.35719e-06	0.681654	0.195858	0.00751917	-0.000858564	0.0446133
cg03021802	8	21923841	EPB49	5'UTR	Island	5.72388e-06	0.410349	0.258538	-0.0130165	-0.00306885	0.0692396
cg03025135	15	89632325	ABHD2	5'UTR	Shore	3.58548e-07	0.646561	0.00697791	-0.0111276	-0.00128177	0.126141
cg03036557	13	92050720	GPC5	TSS1500	Shore	4.44872e-19	0.468886	0.738682	0.0364457	-0.00323933	-0.0244627
cg03041738	1	228652338	NA	NA	Island	6.43684e-07	0.123099	0.123171	0.0174127	0.00695785	-0.114184
cg03118021	6	1838155	GMDS	Body	OpenSea	8.85402e-07	0.061997	0.0602069	0.0155327	-0.00764287	-0.126337
cg03180134	4	141013665	MAML3	Body	OpenSea	7.22175e-06	0.389085	0.0868522	-0.0105398	-0.00263185	0.0863822
cg03267280	2	169374391	LASS6	Body	OpenSea	1.2312e-05	0.773758	0.00746861	0.0198597	0.00170049	-0.264701
cg03282312	6	53305580	NA	NA	OpenSea	4.64554e-06	1.53133e-05	0.0218326	-0.0114017	-0.0146636	-0.123089
cg03490115	2	74681972	INO80B	TSS1500	Island	1.37978e-06	0.116745	0.0978683	0.0161499	0.00679758	-0.117829
cg03507326	16	2801952	LOC100128788	Body	Island	8.26174e-06	0.649992	0.212971	0.0161105	-0.00213164	-0.0963744
cg03511671	1	203019520	PPFIA4	TSS1500	OpenSea	2.32041e-06	0.381359	0.0369613	0.0167291	0.00400966	-0.158349
cg03538814	19	34667843	LSM14A	Body	Shelf	1.05108e-05	0.431777	0.0236855	0.0111978	0.00260323	-0.124438
cg03545227	2	220173100	PTPRN	Body	Island	8.32377e-18	0.192515	0.947017	0.0188414	0.0031936	-0.00266107
cg03607117	3	53080440	SFMBT1	TSS1500	Island	1.67766e-10	0.708007	0.900438	0.0169447	0.00121793	0.00667553
cg03607573	11	93471889	TAF1D	Body	Shelf	1.36148e-05	0.82916	0.0414827	0.00902033	0.000582949	-0.0913965
cg03688818	3	49711147	APEH	TSS1500	Island	3.10371e-06	0.243061	0.591905	0.0128241	0.00416412	-0.0312979
cg03806812	2	86180836	NA	NA	OpenSea	6.98332e-07	0.452786	0.00268344	-0.00629836	0.00122397	0.082161
cg03832162	2	145281739	NA	NA	Island	9.45193e-07	0.990413	0.269597	0.0219547	-6.91136e-05	-0.104568
cg03943826	15	72612556	BRUNOL6	TSS200	Island	1.27023e-06	0.948821	0.308953	0.012778	-0.000217817	-0.056825
cg03968755	4	85418816	NKX6-1	1stExon	Island	3.74672e-08	0.371662	0.0536518	0.0156294	0.00321024	0.114704
cg04008429	3	160167646	TRIM59	TSS200	Island	3.37482e-09	0.585117	0.299657	0.0131843	0.00151807	-0.0474369
cg04084157	7	100809049	VGF	TSS200	Island	4.60754e-09	0.974016	0.53088	0.0127002	-8.8095e-05	0.0278487
cg04090392	15	83952774	BNC1	Body	Island	2.14623e-05	0.788422	0.114251	0.0134611	0.00111032	0.107949
cg04149578	10	134202519	NA	NA	OpenSea	3.0197e-06	0.0542013	0.000948664	-0.0136823	-0.0073629	0.211548
cg04208434	3	129513427	TMCC1	Body	OpenSea	1.40595e-05	0.126509	0.176948	-0.00940744	-0.00433925	0.0628508
cg04212239	3	160119314	SMC4	Body	Shore	9.06793e-06	0.643273	0.0594976	0.0217002	-0.00294514	0.198457
cg04221461	1	243877024	AKT3	Body	OpenSea	6.13416e-06	0.831344	0.147407	-0.00571685	-0.00034935	0.0392193
cg04255070	11	22851591	SVIP	TSS1500	Shore	8.56464e-06	0.658353	0.562837	0.0109521	-0.00141479	-0.0303992
cg04268670	5	76926341	OTP	Body	Island	1.24016e-06	0.292233	0.794892	0.0094676	-0.00265297	0.0107185
cg04271792	6	28831393	NA	NA	Shore	2.13764e-10	0.285014	0.313035	0.0268848	0.00557066	-0.0862551
cg04321126	6	39393690	KIF6	Body	OpenSea	1.12181e-05	0.117386	0.151851	-0.00597582	-0.00279048	0.0418734
cg04368796	17	40171968	NKIRAS2	TSS200	Island	4.67541e-13	0.693005	0.114852	0.0243835	0.00157834	-0.104114
cg04431629	1	50890341	DMRTA2	TSS1500	Island	1.37633e-07	0.637877	0.650519	0.0214086	0.00243294	0.0384369
cg04453050	3	51740896	GRM2	TSS200	Island	1.20684e-05	0.307177	0.889485	0.0111217	0.00338779	-0.00754629
cg04501188	1	47904171	FOXD2	1stExon	Island	7.7657e-08	0.888939	0.199905	0.0201305	-0.0006632	-0.100352
cg04521765	10	100028929	LOXL4	TSS1500	Shore	3.2823e-06	0.820829	0.353145	-0.00705071	-0.000443853	0.0299326
cg04521867	19	41054942	SPTBN4	Body	Shore	1.6999e-05	0.725354	0.111643	0.0132785	0.00141496	-0.105846
cg04539476	14	23351487	REM2	TSS1500	OpenSea	1.8936e-05	0.444831	0.000478583	-0.00948685	-0.0022149	0.171431
cg04548815	1	116184387	VANGL1	TSS200	Island	1.88422e-06	0.873457	0.74871	0.0146123	-0.000629635	-0.0207909
cg04566826	19	34289872	KCTD15	5'UTR	Shore	1.20845e-07	0.434679	0.0592996	-0.0103811	0.00194994	0.077876
cg04649897	8	23571979	NA	NA	Island	6.39862e-06	0.623352	0.618918	0.0167732	-0.00236995	-0.0393984
cg04668516	19	35772059	HAMP	TSS1500	Shore	1.21053e-06	0.387803	0.969146	-0.0115375	0.0026454	0.00194095
cg04672210	15	99057794	FAM169B	TSS200	OpenSea	2.02804e-05	0.504952	0.0435453	0.0135181	0.00276386	-0.138674
cg04684267	19	58694502	ZNF274	1stExon	Island	1.67628e-08	0.143773	0.432672	0.0148295	0.00485669	0.0426137
cg04742719	7	100463759	SLC12A9	Body	Island	2.75295e-06	0.0878248	0.00679553	-0.00733897	-0.00347844	0.0916078
cg04766834	13	45912168	TPT1	Body	Shelf	2.16513e-05	0.48982	0.114764	0.0135863	0.00288841	-0.108852
cg04834794	3	128400154	NA	NA	Island	8.19588e-08	0.135069	0.121378	0.0213343	0.00758179	-0.129052
cg04845871	1	207996319	NA	NA	OpenSea	9.25438e-07	0.313399	0.515779	-0.010684	0.00282675	0.0298628
cg04870212	1	6464845	NA	NA	OpenSea	1.04363e-06	0.997044	0.00869836	0.00907894	8.85071e-06	-0.104804
cg04880546	12	120868468	NA	NA	OpenSea	1.36063e-17	0.0275314	0.0990424	0.0297395	0.00867911	0.106018
cg04902811	10	99478719	LOC100270710	TSS1500	OpenSea	2.71913e-06	0.34076	0.323793	-0.00846931	0.00222704	0.0378669
cg04911280	6	44281184	AARS2	TSS200	Island	8.33208e-08	0.242104	0.0741275	0.0184482	0.00512329	-0.129007
cg04981166	20	37057418	LOC388796	Body	OpenSea	1.1143e-06	0.0506989	0.180359	0.0142234	0.00741125	-0.0829521
cg04995846	1	154943300	SHC1	5'UTR	Shelf	3.12797e-06	0.277926	0.523399	-0.0109251	-0.0032968	0.0317609
cg05030450	5	167480853	ODZ2	Body	OpenSea	1.85186e-05	0.0776225	0.223101	0.0160442	0.00869857	-0.0981482
cg05113927	2	27531244	UCN	TSS200	Island	1.01369e-05	0.667511	0.386939	0.0083458	0.00105686	-0.0349912
cg05136956	8	142435658	PTP4A3	Body	Shore	2.02782e-06	0.000165052	0.00187953	0.0077661	0.00825083	-0.110391
cg05164634	12	49366538	WNT10B	TSS1500	Shelf	1.01568e-05	0.0292694	0.00275969	-0.00695027	-0.00452138	0.103066
cg05176991	18	24128116	KCTD1	5'UTR	Island	4.63689e-06	0.111014	0.479446	0.0291028	0.0132043	0.095658
cg05190718	1	116310712	CASQ2	Body	OpenSea	1.29928e-05	0.909132	0.000291935	0.0110867	0.000377964	-0.203939
cg05222347	17	36105117	HNF1B	TSS200	Shore	5.87304e-06	0.190391	0.0478192	0.0166952	0.00628611	-0.156856
cg05239163	1	154191266	UBAP2L	TSS1500	Shore	1.21835e-09	0.927061	0.000439245	0.0170595	0.000318371	-0.207421
cg05256420	10	133980556	JAKMIP3	3'UTR	OpenSea	5.60193e-06	0.908046	0.183218	0.010032	0.000330878	-0.0628729
cg05305078	11	131056727	NA	NA	OpenSea	2.87935e-06	0.00924737	0.000798527	-0.0100643	-0.00736504	0.157635
cg05372963	16	8807026	ABAT	5'UTR	OpenSea	3.30321e-06	0.156806	0.0137781	0.0162539	0.00643214	-0.185656
cg05460965	6	36645100	CDKN1A	TSS1500	Shore	1.92098e-05	0.935672	0.148565	-0.00578106	0.000142474	-0.0420892
cg05540369	16	3355553	ZNF75A	1stExon	Island	1.73875e-07	0.00445584	0.102542	0.0257873	0.0182551	-0.16954
cg05555455	3	148804550	HLTF	TSS1500	Island	2.15061e-07	0.743282	0.914906	0.0182568	0.00146976	-0.00786882
cg05572763	11	20631898	SLC6A5	Body	OpenSea	2.14671e-05	0.251506	0.26988	0.00761547	0.00269298	-0.04252
cg05602648	1	230778078	COG2	TSS200	Island	1.67245e-05	0.0519471	0.991122	0.0170774	0.0101565	-0.000944875
cg05691543	16	85254100	NA	NA	OpenSea	1.33951e-05	0.096569	0.271706	-0.0102083	0.0051127	0.0552797
cg05708550	5	137688227	KDM3B	TSS200	Island	7.18557e-11	0.108137	0.209209	0.0175289	0.00530752	-0.0679097
cg05751100	6	26550783	NA	NA	Island	2.38706e-05	0.196302	0.0840571	0.0112251	0.00450488	-0.0992082
cg05758467	2	240035894	HDAC4	Body	Shelf	2.35583e-06	0.485904	0.00599613	-0.00980085	-0.00186991	0.123341
cg05824218	17	38499096	RARA	1stExon	Shore	1.04776e-06	0.164741	0.0280173	-0.0134558	-0.00494603	0.12938
cg05903330	22	39542136	CBX7	Body	Island	7.59944e-07	0.299693	0.600012	-0.0137605	-0.00371288	0.0307492
cg05906092	7	140098427	SLC37A3	TSS200	Island	5.08736e-07	0.296389	0.954125	0.0143772	0.00383747	0.00346012
cg05917988	6	44281197	AARS2	TSS200	Island	2.14444e-11	0.33115	0.949676	0.0218559	0.00385275	0.00409679
cg05958294	13	113834216	PCID2	Body	OpenSea	8.42547e-07	0.624915	0.000979359	0.00735226	0.000937441	-0.106741
cg05979320	12	49629187	NA	NA	Shore	2.88082e-06	0.570212	0.856781	0.0129049	0.00202488	0.010557
cg05991454	4	147558435	NA	NA	Island	2.14605e-05	0.0202882	0.758569	0.0193406	0.0139937	-0.0299919
cg06005318	6	30690213	TUBB	Body	Shore	1.40357e-05	0.760018	0.122156	0.00897029	0.000822141	-0.0687081
cg06022942	10	8095484	FLJ45983	TSS200	Island	2.80751e-06	0.372624	0.904408	0.0164517	0.00405372	-0.00894412
cg06024557	5	149432002	HMGXB3	3'UTR	OpenSea	1.31816e-05	0.984031	0.187769	0.00897484	-5.36966e-05	-0.0582719
cg06034933	1	228645634	HIST3H2A	TSS200	Island	7.20945e-07	0.739335	0.908343	0.0147803	0.00127323	-0.00722933
cg06073351	10	22625665	NA	NA	Island	1.16413e-06	0.286569	0.000204271	0.0106875	0.00302158	0.178806
cg06075438	17	48616406	EPN3	Body	Shore	1.48931e-06	0.577761	0.513225	-0.00829767	-0.00123677	0.0238512
cg06087623	1	2203012	SKI	Body	OpenSea	3.85979e-06	0.720862	0.00159708	0.0153006	0.00153225	-0.228096
cg06121469	15	44956098	SPG11	TSS1500	Shore	2.46197e-08	0.314504	0.216759	0.0234892	0.00535114	-0.108011
cg06128028	7	35293892	TBX20	TSS200	Island	9.72783e-06	0.338601	0.461628	0.00924998	-0.00260865	0.0329075
cg06144905	17	27369780	PIPOX	TSS200	OpenSea	1.51526e-07	0.895684	0.832636	0.0255993	-0.000813129	0.0215127
cg06220235	16	11349023	SOCS1	Body	Island	1.68393e-06	0.920039	0.0834211	0.015274	0.000412597	-0.117723
cg06350853	1	168890140	NA	NA	OpenSea	1.12521e-08	0.000335791	0.000326647	-0.0133712	-0.0109	0.179296
cg06404572	8	131374842	ASAP1	Body	Shelf	7.47224e-06	0.28234	0.0207445	0.00828864	0.002591	-0.0925112
cg06416491	12	39837660	KIF21A	TSS1500	Shore	9.87966e-06	0.757672	0.061796	-0.00771045	0.000700169	0.070201
cg06458239	19	58038573	ZNF549	TSS200	Island	1.81017e-19	0.187601	0.397223	0.0458553	0.00731779	-0.0769611
cg06488443	2	162280341	TBR1	Body	Island	1.72174e-06	0.250715	0.846199	0.0122126	0.00379189	0.010475
cg06489037	3	107706245	NA	NA	OpenSea	2.3899e-05	0.012593	0.0735065	-0.0130967	-0.0102738	0.119985
cg06530490	2	118981783	NA	NA	Island	1.70115e-05	0.555887	0.155269	0.0174194	0.00311386	-0.12388
cg06564388	5	153855257	HAND1	3'UTR	Island	9.14201e-06	0.0235637	0.932895	0.0123162	-0.00828319	-0.00498786
cg06580318	2	169747119	SPC25	TSS200	Shore	1.20344e-11	0.0157584	0.575951	0.0218624	0.00954953	0.0357802
cg06603828	5	149829668	RPS14	TSS1500	Shore	4.24136e-06	0.727757	0.0650068	0.0106898	0.0010479	-0.0919715
cg06639320	2	106015739	FHL2	TSS200	Island	1.82905e-09	0.708782	0.310215	0.012443	-0.000960236	0.0429243
cg06645033	1	50890678	NA	NA	Island	5.20486e-08	0.265493	0.807908	0.0148809	0.00386179	0.0137969
cg06737494	3	172167644	GHSR	TSS1500	Island	2.84041e-11	0.0329091	0.0093747	0.0218452	0.00860092	0.172957
cg06782035	5	16179135	2016-03-11	Body	Island	1.60183e-07	0.686464	0.6143	0.0207018	0.00202976	-0.0416037
cg06875162	1	28184973	NA	NA	OpenSea	6.85152e-06	0.675883	0.0098787	-0.00822732	-0.000993011	0.102337
cg06906555	1	205011906	CNTN2	TSS1500	OpenSea	4.44534e-06	0.752978	0.0266586	-0.0102071	0.000906701	0.106167
cg06916446	5	179105010	NA	NA	Shore	2.19031e-05	0.529037	0.799065	0.0160358	-0.00310888	0.0206177
cg06959103	17	45810436	TBX21	TSS200	Shore	2.14741e-06	0.95786	0.85674	0.01333	0.00019174	0.0107534
cg06991495	22	38714466	CSNK1E	TSS1500	Shore	4.4243e-06	0.901383	0.21577	-0.0114877	0.000401602	0.0661156
cg06993413	15	65810204	DPP8	TSS200	Shore	1.27683e-07	0.660126	0.699975	0.0145688	0.00154207	0.0221785
cg07029777	2	1658233	PXDN	Body	OpenSea	2.80065e-06	0.296395	0.00681279	0.0153751	-0.00443995	-0.192017
cg07037509	1	112285979	C1orf183	Body	Shelf	6.12554e-07	0.169583	0.00488455	0.0138682	0.00491928	-0.168146
cg07056299	7	73393148	NA	NA	OpenSea	1.21949e-05	0.220283	0.629345	-0.00836949	-0.00306576	0.0197473
cg07066898	19	17717094	UNC13A	Body	Island	7.14227e-09	0.170408	0.166735	0.0172483	0.005137	0.0850564
cg07131451	4	113437276	NEUROG2	1stExon	Island	9.80736e-07	0.235701	0.757063	0.0121833	0.00380552	0.0162384
cg07150145	1	47656137	PDZK1IP1	TSS1500	OpenSea	1.01527e-05	0.0760763	0.344082	-0.00690976	-0.00364228	0.0316959
cg07247419	20	21376484	NKX2-4	3'UTR	Island	1.79811e-05	0.0993184	0.0935792	0.00770333	0.00389011	0.0649784
cg07303143	3	44803452	KIAA1143	TSS1500	Island	5.34562e-21	0.210384	0.295046	0.0413583	0.00589258	-0.0807583
cg07388347	12	133481466	NA	NA	Shelf	4.71179e-08	0.430734	0.78964	0.0267644	0.00488836	0.027127
cg07409643	6	33419766	SYNGAP1	3'UTR	Shelf	1.41348e-06	0.929024	0.64354	0.0128767	0.000306116	-0.0261181
cg07413480	10	113243726	NA	NA	OpenSea	3.87672e-06	0.230635	0.0799148	0.016222	-0.00547024	-0.131739
cg07477282	15	44956107	SPG11	TSS1500	Shore	4.58044e-07	0.142162	0.553362	0.0155149	0.00581095	-0.0383332
cg07502389	8	24771259	NEFM	TSS200	Island	2.04491e-08	0.0101495	0.0899716	0.0147285	0.00864597	0.0926732
cg07544187	19	19651235	CILP2	Body	Island	3.74838e-06	0.784125	0.820817	0.0291254	0.00223264	-0.0302967
cg07547549	20	44658225	SLC12A5	Body	Island	1.13906e-08	0.769111	0.466132	0.0117734	0.000759502	0.0309879
cg07551364	1	27693782	MAP3K6	TSS1500	Shore	9.18554e-06	0.765968	0.00932377	-0.00876822	0.000765102	0.111663
cg07553761	3	160167977	TRIM59	TSS1500	Island	5.99065e-09	0.441917	0.89243	0.012856	0.00212746	0.00613174
cg07570470	8	142318841	NA	NA	Island	1.21014e-08	0.815201	0.867397	0.0197085	-0.00101439	-0.0118937
cg07572214	7	68922405	NA	NA	OpenSea	5.27906e-06	0.939322	5.8136e-06	0.0182534	-0.000395548	-0.408664
cg07589899	2	62020677	NA	NA	OpenSea	3.66756e-10	0.0903652	0.877811	0.0134345	0.00450209	-0.00665837
cg07640648	19	39993697	DLL3	Body	Island	7.06274e-06	0.473721	0.440257	0.0170245	-0.00352993	-0.0624276
cg07687610	12	32832045	DNM1L	TSS200	Shore	7.73272e-06	0.777402	0.838874	0.012635	0.00103753	-0.0122474
cg07726139	1	228652528	NA	NA	Island	5.83936e-06	0.581463	0.0914521	0.0181332	-0.0028627	-0.144843
cg07760161	17	7588378	TP53	5'UTR	Shore	7.11144e-07	0.00204824	0.605282	0.0073916	0.00604642	-0.0162305
cg07762458	8	6466817	MCPH1	Body	OpenSea	2.14427e-05	0.453434	0.0535305	0.0184665	-0.00426053	-0.18161
cg07806886	3	120626899	STXBP5L	TSS200	Island	1.55392e-06	0.390205	0.646843	0.0218932	0.00505277	-0.0441598
cg07850154	5	63461232	RNF180	TSS1500	Shore	3.56674e-09	0.308558	0.65063	-0.0119401	0.00257404	0.0187502
cg07850604	14	36003443	INSM2	5'UTR	Island	3.74144e-07	0.969416	0.0320002	0.0162257	0.000156474	0.145416
cg07873590	19	17858298	FCHO1	TSS1500	Shore	6.48204e-07	0.34841	0.98179	0.0176776	0.00427995	0.00170609
cg07925311	16	57835436	KIFC3	5'UTR	Shore	3.84653e-07	0.00729268	0.529038	-0.00795059	-0.00547612	-0.0207078
cg07995893	7	104650933	NA	NA	Shelf	6.59113e-07	0.44247	0.370234	0.0095689	-0.00189753	-0.0363576
cg08014182	6	33241594	RPS18	Body	Shore	2.09356e-06	0.161151	0.000315316	0.0146277	0.00560195	-0.24349
cg08056069	1	95179425	NA	NA	OpenSea	1.33071e-05	0.969891	0.615533	-0.00816332	-9.21562e-05	0.0201388
cg08061755	11	9781826	NA	NA	Shore	9.89798e-06	0.690937	0.867933	-0.00613806	0.000718435	-0.00493031
cg08080174	16	72992580	ZFHX3	Body	Shore	1.86668e-05	0.698318	0.0687025	0.0100601	0.00118912	-0.0924437
cg08081390	16	31195218	FUS	Body	Shelf	1.38739e-05	0.836474	0.621772	0.00771291	0.000477299	-0.0187353
cg08097417	7	130419133	KLF14	TSS1500	Island	2.75278e-07	0.354849	0.00524963	0.0111371	0.00256412	0.129346
cg08097614	19	46388787	IRF2BP1	1stExon	Island	1.5574e-05	0.410411	0.924723	0.0108302	0.00269477	-0.00506805
cg08160331	11	75140865	KLHL35	1stExon	Island	1.93394e-10	0.626765	0.976355	0.0117171	-0.00109837	0.00109816
cg08209133	4	48485624	SLC10A4	1stExon	Island	4.64015e-06	0.941318	0.214113	0.0106062	-0.000220799	0.0614138
cg08224212	11	34196093	ABTB2	Body	Island	4.62166e-07	0.287883	0.0808247	0.0154066	0.00416839	-0.112974
cg08229360	3	37904475	CTDSPL	Body	Shore	3.06412e-06	0.835797	0.178878	-0.00867667	0.000498179	0.0532797
cg08255481	16	88103035	BANP	Body	Shore	4.70671e-06	0.0958326	0.0327876	0.013022	0.00618283	-0.130701
cg08278892	19	55574619	RDH13	TSS200	Island	9.38764e-09	0.565451	0.619026	0.0177506	-0.00222842	-0.0316362
cg08301211	6	14195031	NA	NA	OpenSea	1.48562e-05	0.0690353	0.750668	0.0187133	0.0103292	0.0293793
cg08318076	8	62051812	NA	NA	Island	1.73576e-06	0.426802	0.676627	0.013389	0.002872	0.024711
cg08357125	2	73404999	NA	NA	Shore	5.70489e-06	0.990822	0.00591829	-0.00979778	-3.22118e-05	0.129089
cg08482682	11	107799197	RAB39	TSS200	Island	1.689e-08	0.253277	0.0692906	0.00745247	0.00190365	-0.0499479
cg08495027	22	31364830	MORC2	TSS1500	Island	5.10652e-06	0.46795	0.472932	0.00790929	0.0016337	-0.0265154
cg08526825	16	2802229	SRRM2	TSS200	Island	3.47957e-09	0.290369	0.155067	0.0160417	0.00358874	-0.0794057
cg08541518	6	69942892	BAI3	Body	OpenSea	1.92316e-05	0.439451	0.793101	0.0112914	0.00266995	0.0148469
cg08565632	16	89650991	CPNE7	Body	Island	1.87583e-06	0.384133	0.94547	0.0146093	-0.00344581	0.00443612
cg08606497	8	28244769	ZNF395	TSS1500	Shore	8.76267e-06	0.281666	0.0526623	-0.00947602	0.00299162	0.0889925
cg08614301	19	19729716	PBX4	TSS1500	Island	5.08742e-07	0.3504	0.059578	0.0150006	-0.00357851	-0.119346
cg08622677	12	3601306	PRMT8	Body	Island	1.92079e-11	0.0364335	0.896911	0.0166269	0.00634846	-0.00637907
cg08623942	7	98633538	SMURF1	Body	Shore	1.66936e-05	0.139463	0.566732	0.00711685	0.00320432	-0.0202886
cg08680415	6	30686922	TUBB	TSS1500	Shore	1.08552e-05	0.733772	0.562866	0.0122801	-0.00123561	-0.034522
cg08682036	10	43898033	HNRNPF	5'UTR	OpenSea	6.24651e-09	0.135193	0.0655204	0.0132789	0.00429397	-0.0871565
cg08694014	16	68482591	SMPD3	TSS200	Island	2.63996e-10	0.88163	0.695464	0.0117378	0.000339867	-0.0146706
cg08715791	11	66189297	NPAS4	Body	Island	5.66834e-13	0.586465	0.0472748	0.0227391	0.00203847	-0.123212
cg08776660	16	1670473	CRAMP1L	Body	OpenSea	2.04322e-06	0.351343	0.00571744	0.0109851	0.00278679	-0.13811
cg08781738	8	117876328	RAD21	Body	OpenSea	1.57536e-05	0.497906	0.279367	0.0138255	-0.00283268	-0.0743465
cg08785215	3	57993979	FLNB	TSS200	Island	2.2267e-06	0.258709	0.518264	0.011798	-0.0036461	-0.0341535
cg08862742	11	3022200	CARS	3'UTR	OpenSea	1.96713e-05	0.890564	0.0345277	0.0082941	-0.000348949	-0.0890436
cg08872742	16	66400320	CDH5	TSS1500	OpenSea	9.20844e-06	0.345034	0.819836	-0.00840106	-0.00233082	0.00920729
cg08900043	12	54378896	HOXC10	TSS200	Island	2.21736e-05	0.155127	0.435444	0.0125564	0.00552557	-0.0495692
cg08903181	12	89018232	NA	NA	OpenSea	4.40038e-06	0.622221	0.0025487	0.0143206	0.00199127	-0.204969
cg08994384	3	62363642	NA	NA	Shore	8.79697e-06	0.914451	0.168075	0.0156649	-0.000492083	0.104159
cg09012544	2	71503562	NA	NA	Island	4.26131e-08	0.529153	0.0173337	0.013935	-0.00202381	-0.127384
cg09060789	11	1884988	LSP1	Body	OpenSea	1.79763e-08	0.0276257	0.083931	-0.0199926	-0.00996171	0.127668
cg09084885	15	39865765	NA	NA	OpenSea	8.69247e-06	0.829661	0.0030417	0.0101276	0.000636768	-0.147373
cg09110241	2	227079364	NA	NA	OpenSea	2.03168e-05	0.144991	0.061127	0.012358	-0.00554857	-0.117446
cg09151801	1	1471210	C1orf70	Body	Island	3.43994e-07	0.490145	0.00365273	0.011801	0.00204354	-0.144326
cg09190280	4	2043414	C4orf48	TSS1500	Island	9.42309e-06	0.0551205	0.999125	0.0119981	0.00682001	-6.34147e-05
cg09226692	6	43422490	DLK2	Body	Island	1.66144e-05	0.00851944	0.42267	0.00809019	-0.00656525	0.032298
cg09286183	16	2042466	SYNGR3	Body	Island	1.61409e-05	0.454613	0.197247	0.00526646	-0.00119235	-0.0338482
cg09378441	7	36429182	ANLN	TSS1500	Shore	8.94015e-07	0.543752	0.160318	0.0124195	0.00197251	-0.0751887
cg09427311	9	129885730	ANGPTL2	TSS1500	OpenSea	7.66135e-06	0.913389	0.457112	-0.00773276	0.000244131	-0.0274358
cg09503974	3	158449660	RARRES1	Body	Shore	1.22733e-05	0.973402	0.738755	-0.0098209	-9.74975e-05	0.0160118
cg09524078	3	52805336	NEK4	TSS1500	Shore	1.13742e-05	0.400716	0.00607045	-0.0095895	-0.00239386	0.13066
cg09545443	3	106960066	LOC344595	Body	Shore	9.44477e-10	0.0706602	0.66221	-0.0236373	0.00871583	0.0342926
cg09559780	16	50727221	NA	NA	OpenSea	3.68741e-06	0.875446	0.0123607	-0.00986261	0.000432167	0.115111
cg09593028	10	97890481	ZNF518A	5'UTR	Shore	1.08038e-05	0.0323739	0.741336	0.0132562	0.00848964	-0.0212421
cg09644157	12	124896212	NCOR2	Body	OpenSea	1.41755e-06	0.0341303	0.44306	-0.00565206	0.00323454	-0.0190238
cg09661809	11	74953082	NA	NA	Island	1.28144e-05	0.709921	0.0500857	0.00779142	-0.000865288	0.0755499
cg09723511	16	66435676	CDH5	Body	Shore	2.00312e-06	0.295434	0.69273	0.0152523	0.00434231	-0.0268517
cg09903452	17	75315244	2016-09-09	5'UTR	OpenSea	1.54792e-06	0.210861	0.0168177	-0.00594522	0.00200204	0.0634871
cg09941452	7	97557827	NA	NA	Island	3.34888e-09	0.70637	0.413496	0.0170704	-0.00135547	-0.0483611
cg09977376	1	53951348	NA	NA	OpenSea	6.43047e-06	0.431687	0.217228	0.00992696	0.00224856	0.0580577
cg10030512	7	2656424	NA	NA	OpenSea	2.31274e-05	0.815634	0.00265275	0.0116452	-0.000838157	-0.18163
cg10039523	1	12517834	VPS13D	Body	OpenSea	3.43103e-07	0.101069	0.065285	-0.0114003	-0.00471791	0.0872203
cg10045354	11	111169427	C11orf93	TSS1500	Island	9.70348e-06	0.0577387	0.6307	-0.00544464	0.0030664	-0.0126369
cg10046620	6	27775042	HIST1H2AI	TSS1500	Shore	2.11075e-05	0.260637	0.602802	0.0162866	0.00564344	-0.0427385
cg10102418	12	510594	CCDC77	TSS200	Island	2.18162e-05	0.629579	0.93627	0.0121778	0.00180779	-0.00491625
cg10140240	17	76220672	BIRC5	3'UTR	OpenSea	1.78611e-09	0.184658	0.218444	-0.0230965	-0.00635289	0.0966769
cg10142237	22	38714395	CSNK1E	TSS1500	Shore	1.55725e-08	0.199699	0.06265	-0.0140335	-0.00401584	0.0961547
cg10226744	22	46068542	ATXN10	Body	Shore	5.15674e-07	0.283064	0.507959	0.0126154	0.00346419	-0.0350007
cg10271260	10	88020589	GRID1	Body	Shelf	3.7482e-06	0.751008	0.0151317	0.00984876	-0.000874529	-0.111604
cg10324158	3	45067713	CLEC3B	TSS200	OpenSea	6.8708e-07	0.133304	0.0221028	-0.0121967	-0.00475716	0.119991
cg10359807	16	9055526	USP7	Body	Shore	1.08942e-05	0.012726	0.0753518	0.0138571	0.0103824	-0.120658
cg10377921	19	15391946	BRD4	TSS1500	OpenSea	1.73509e-05	0.880643	0.1252	-0.00986125	0.000449534	0.0758147
cg10414829	10	88719259	SNCG	Body	OpenSea	1.16757e-05	0.133644	0.0170551	-0.00710867	-0.00318492	0.083912
cg10451621	8	6345256	MCPH1	Body	OpenSea	2.19732e-06	0.69129	0.0280545	0.0160119	-0.00173354	-0.159358
cg10469100	3	44690127	ZNF35	TSS200	Island	1.92153e-05	0.12228	0.367704	0.0122196	0.00580246	-0.0552867
cg10480239	22	23522307	BCR	TSS1500	Shore	1.88395e-06	0.178686	0.000408236	-0.0131278	0.00479894	0.21306
cg10500283	1	7913081	UTS2	1stExon	OpenSea	3.61095e-06	0.0107867	0.126035	0.018399	0.0133279	-0.129826
cg10501210	1	207997020	NA	NA	OpenSea	4.95366e-10	0.119736	0.572691	-0.0224195	0.00695809	0.0411766
cg10506151	2	183683268	NA	NA	OpenSea	5.46443e-07	0.0630211	0.749796	-0.0153762	-0.00737588	-0.0205841
cg10516146	17	37897246	GRB7	5'UTR	OpenSea	1.21268e-05	0.504675	0.0240952	-0.00502906	-0.00099951	0.0561576
cg10523671	3	121612956	SLC15A2	TSS1500	OpenSea	1.03105e-05	0.558069	0.0123846	-0.0072224	-0.00124873	0.0889107
cg10548038	13	92050731	GPC5	TSS1500	Shore	9.02101e-14	0.95749	0.0307155	0.0185539	-0.000155838	-0.104985
cg10548492	7	96746798	ACN9	1stExon	Island	7.23231e-08	0.736961	0.81529	0.0162426	-0.00128382	-0.0146539
cg10577534	15	67354460	NA	NA	Shelf	2.71341e-06	0.35415	0.409634	-0.00665872	0.00170258	0.0248569
cg10598582	17	43093761	NA	NA	Shelf	6.10502e-06	0.346464	0.467829	-0.00689253	0.00186558	0.0235914
cg10625705	20	307320	SOX12	1stExon	Island	2.40358e-06	0.0248437	0.30403	0.0101791	0.00633583	0.0471353
cg10627428	3	122514814	DIRC2	Body	Shore	3.18021e-06	0.38728	0.0417199	-0.00834325	-0.00200554	0.0782386
cg10628205	1	61547131	NFIA	Body	Shore	3.49334e-06	0.556767	0.104574	-0.0156438	-0.00256522	0.117003
cg10649156	22	39688157	NA	NA	Island	2.06685e-07	0.113491	0.481056	-0.00584714	-0.00228555	0.0166125
cg10661163	7	116592959	ST7OT4	TSS1500	Shore	1.20516e-09	0.903311	0.000670314	-0.013039	-0.000322811	0.153022
cg10713515	10	22603999	COMMD3	TSS1500	Shore	1.70678e-05	0.102466	0.276268	-0.0114839	0.00572817	0.0624388
cg10729426	19	58038585	ZNF549	TSS200	Island	2.53934e-17	0.931232	0.334847	0.0362646	-0.000414102	-0.0761471
cg10732215	10	22625465	NA	NA	Island	1.46886e-05	0.934088	0.92285	0.00978199	0.000243297	0.00467642
cg10806820	3	48699090	CELSR3	1stExon	Island	9.38036e-07	0.445707	0.366986	0.0126657	0.00253355	0.0492255
cg10943458	3	120627085	STXBP5L	1stExon	Island	3.3034e-06	0.685897	0.406675	0.013803	0.00155261	0.0523587
cg10947146	8	11058710	XKR6	1stExon	Island	7.51118e-08	0.101225	0.281948	0.0187263	0.00728259	0.0781564
cg10997540	12	71376748	NA	NA	OpenSea	6.50695e-08	0.0457442	0.000723266	0.0207821	-0.00983099	-0.278574
cg11035122	14	101491994	MIR758	TSS1500	OpenSea	2.08485e-05	0.409254	0.954297	0.0118883	-0.00301511	-0.00343093
cg11071401	17	48637194	CACNA1G	TSS1500	Island	2.05596e-14	0.183737	0.451314	0.0168531	0.00342828	0.0317831
cg11075316	3	160167725	TRIM59	TSS200	Island	1.04049e-10	0.477563	0.16305	0.0189762	0.00255306	-0.0826185
cg11082362	14	36003181	INSM2	TSS200	Island	3.79858e-08	0.489397	0.460598	0.0101375	-0.00161065	-0.0282241
cg11084334	3	9594264	LHFPL4	Body	Island	2.75899e-06	0.795536	0.172203	0.00960074	0.000685648	0.0595736
cg11123644	2	219597614	TTLL4	5'UTR	OpenSea	1.40726e-05	0.0229125	0.217952	-0.00860327	-0.00595322	0.0524058
cg11147278	10	34062234	NA	NA	OpenSea	6.22669e-06	0.01625	0.0268561	-0.0137191	-0.00961304	0.144997
cg11192895	13	21596682	LATS2	Body	OpenSea	6.95464e-06	0.0189727	0.161003	0.0131883	0.00906697	-0.0880829
cg11229185	10	22625274	NA	NA	Island	3.99317e-07	0.871037	0.791876	0.0132879	0.000544124	0.0145188
cg11299854	5	132083184	CCNI2	1stExon	Island	1.75239e-08	0.869489	0.151219	0.018947	-0.000694639	-0.100134
cg11549953	5	43018282	NA	NA	Island	9.56674e-06	0.652121	0.456115	0.0219005	-0.00290159	-0.0788064
cg11614451	3	160167729	TRIM59	TSS200	Island	9.05447e-12	0.0131959	0.400645	0.0213652	0.00951484	0.0521994
cg11625933	3	81811322	GBE1	TSS1500	Shore	2.36184e-06	0.562248	0.147521	-0.00910061	0.00144355	0.0594968
cg11658419	12	58290850	NA	NA	Shore	2.97303e-06	0.599206	0.000857448	-0.017575	0.00255634	0.273985
cg11667101	10	105127581	TAF5	TSS200	Island	2.19182e-09	0.746133	0.146057	0.0297067	0.00199868	-0.148087
cg11705975	10	120354248	PRLHR	Body	Island	4.09289e-06	0.793732	0.538474	0.0113819	-0.000836421	0.032325
cg11804928	17	38220298	THRA	5'UTR	Shore	3.66279e-06	0.700943	0.0384222	-0.0150779	-0.00161877	0.144822
cg11805311	10	88728073	C10orf116	TSS200	Island	5.76769e-06	0.644281	0.0592934	-0.0172637	-0.0022808	0.154286
cg11844042	4	153602251	TMEM154	TSS1500	OpenSea	1.73475e-06	0.170833	0.0223839	0.0174436	0.00646957	-0.178665
cg11847636	19	50015523	FCGRT	TSS200	Shore	1.67501e-05	0.00104541	0.214057	-0.010473	-0.0107044	0.0649758
cg11912239	17	76220608	BIRC5	3'UTR	OpenSea	4.0635e-06	0.484708	0.233356	-0.00965233	-0.00189702	0.0532384
cg12027135	4	119276652	NA	NA	Shelf	1.70002e-05	0.597938	0.203137	0.0165172	-0.00264322	-0.105074
cg12029281	6	35461818	TEAD3	5'UTR	Shelf	1.83885e-05	0.101907	0.349386	-0.00419161	-0.00210314	0.0196554
cg12055316	2	27601353	ZNF513	Body	Island	3.48589e-06	0.729042	0.772693	-0.00617833	-0.000596768	0.00816728
cg12079303	1	61547163	NFIA	Body	Shore	3.93598e-07	0.128737	0.197066	-0.0170532	-0.00657005	0.0914171
cg12094736	10	105524943	SH3PXD2A	Body	OpenSea	1.48317e-05	0.214041	0.00230167	0.0100008	0.00375442	-0.154349
cg12100751	1	109203672	C1orf59	1stExon	Island	1.70019e-09	0.385907	0.624457	0.026142	-0.0046799	-0.0433113
cg12141030	3	44803447	KIAA1143	TSS1500	Island	5.70025e-14	0.595226	0.591326	0.029701	-0.00246185	-0.0408382
cg12141659	11	2847462	KCNQ1	Body	OpenSea	2.19963e-06	0.0709467	0.846007	-0.0103373	-0.00513181	0.00898199
cg12177793	14	24837892	NFATC4	Body	Island	8.4134e-06	0.00117662	0.614342	0.0268368	0.0261249	0.0647917
cg12204897	9	131486753	ZDHHC12	TSS1500	Island	1.26222e-06	0.655837	0.989128	0.0268734	0.00318131	-0.0015958
cg12261786	10	88727830	C10orf116	TSS1500	Shore	1.69408e-06	0.710387	0.210554	-0.00829918	-0.000829813	0.0460992
cg12342451	10	86001509	LRIT1	TSS1500	OpenSea	1.14144e-05	0.936662	0.593533	0.0164714	-0.000388185	-0.0428259
cg12352399	3	25689774	TOP2B	Body	OpenSea	1.96032e-06	0.939158	0.191816	0.0141861	-0.000293484	-0.0827473
cg12373771	22	17601381	CECR6	1stExon	Island	5.19185e-16	0.304116	0.0713619	0.0224179	0.00324922	0.0941283
cg12378187	3	62355443	FEZF2	3'UTR	Island	9.90368e-06	0.974767	0.213155	0.0171692	0.000159814	0.103671
cg12459502	18	60904237	BCL2	Body	OpenSea	3.3877e-06	0.608993	0.531349	-0.00812418	0.00115754	0.0232586
cg12559031	17	48046365	DLX4	TSS200	Island	9.96659e-06	0.192754	0.541227	0.00705728	0.00271813	0.0208546
cg12589298	19	50828905	KCNC3	Body	Island	3.74225e-13	0.525946	0.279071	0.0239727	0.00248099	-0.0696442
cg12663656	12	120427667	CCDC64	1stExon	Island	5.5938e-09	0.68157	0.0341135	0.0218334	0.00192129	-0.164722
cg12678562	13	92050726	GPC5	TSS1500	Shore	3.18642e-12	0.740375	0.891294	0.0236774	-0.00134978	0.00913558
cg12778476	11	22359345	SLC17A6	TSS1500	Shelf	6.81048e-08	0.200503	0.0323443	0.0122941	0.00370987	-0.102604
cg12785694	3	160122168	SMC4	Body	Shelf	2.27478e-08	0.819572	0.459872	0.0220842	0.00113474	-0.0604284
cg12800803	20	60717299	PSMA7	Body	Shore	2.79793e-06	0.110803	0.00929902	0.0096255	0.00426096	-0.115368
cg12840245	4	30855141	PCDH7	Body	OpenSea	7.0878e-06	0.0196903	0.170687	0.0129319	-0.00884546	-0.0844817
cg12874792	14	68831098	RAD51L1	Body	OpenSea	1.21023e-05	0.276646	0.00370205	0.0121442	0.00394303	-0.17605
cg12934382	3	51741135	GRM2	1stExon	Island	2.79357e-06	0.303471	0.972044	0.0280297	0.00797497	0.00444548
cg12946225	19	3573751	HMG20B	Body	Island	2.34296e-05	0.904252	0.713785	0.0116626	0.000433339	0.0216943
cg12976145	7	117502752	CTTNBP2	Body	OpenSea	4.02727e-06	0.00337774	0.295953	0.00953742	0.00803122	0.0460724
cg12980128	18	55105322	ONECUT2	Body	Island	2.57778e-06	0.918982	0.532242	0.0160025	-0.000447048	-0.045103
cg13029847	17	27333273	SEZ6	TSS200	Shore	4.19982e-07	0.137524	0.559098	0.0110595	0.00417589	-0.0268295
cg13049334	5	16783782	MYO10	Body	OpenSea	1.67625e-05	0.505214	0.604568	0.014579	0.00294665	-0.0375719
cg13134650	1	203156764	CHI3L1	TSS1500	OpenSea	6.30614e-06	0.15491	0.343868	-0.00878355	-0.00360883	0.0393008
cg13208333	11	15217886	INSC	Body	OpenSea	1.31395e-06	0.696199	0.0966631	0.0197259	0.00204944	-0.144119
cg13220457	6	135504074	MYB	Body	Island	1.72687e-07	0.469464	0.0759122	0.0109358	-0.00192915	-0.0782419
cg13289553	5	32585524	SUB1	TSS200	Shore	4.65684e-07	0.874422	0.876646	0.012456	-0.000499858	-0.00805812
cg13390284	1	65531864	NA	NA	Shore	7.6151e-08	0.495974	0.0783722	-0.014771	0.00237352	0.10143
cg13433363	20	43375708	KCNK15	Body	Shore	4.49196e-08	0.861795	0.0122388	-0.0130539	-0.000525005	0.126087
cg13442820	19	1672531	NA	NA	Island	1.83513e-08	0.223658	0.547589	0.00768684	0.00209869	-0.0169737
cg13612317	10	32345864	KIF5B	TSS1500	Shore	7.38343e-06	0.221978	0.694977	-0.0165268	-0.00587032	-0.0308265
cg13612447	17	2653188	NA	NA	Island	7.19749e-12	0.988044	0.775989	0.0215587	-5.67597e-05	-0.0176948
cg13665714	22	31496274	SMTN	Body	Shore	1.92417e-05	0.120567	0.00197226	0.0136326	-0.00650415	-0.216924
cg13678641	17	8113909	AURKB	TSS200	Island	1.85629e-07	0.902349	0.116951	0.00846587	-0.000253723	-0.0535583
cg13682722	14	90798568	C14orf102	TSS1500	Shore	8.97774e-07	0.552267	0.752799	0.0157011	-0.00244154	0.0212215
cg13699808	20	45985339	ZMYND8	Body	OpenSea	5.2786e-07	0.022012	0.196954	0.0087728	0.00520111	-0.0476412
cg13724182	2	9761025	YWHAQ	Body	OpenSea	1.57719e-05	0.225133	0.0116827	0.0102979	0.00378637	-0.130893
cg13744663	13	92050675	GPC5	TSS1500	Shore	7.97655e-06	0.939401	0.689206	0.011953	0.000264328	-0.0228339
cg13754877	14	101943654	NA	NA	OpenSea	1.19817e-05	0.01943	0.00161121	0.00789254	0.00556545	-0.124766
cg13830081	6	10404363	TFAP2A	Body	Island	5.59767e-06	0.987515	0.601163	0.0132201	5.90686e-05	0.0324111
cg13914004	9	130659670	ST6GALNAC6	Body	Shore	9.49485e-06	0.0705931	0.0292446	-0.012288	-0.00658026	0.130752
cg13932501	9	94060853	AUH	Body	OpenSea	4.98273e-06	0.587996	0.0418771	-0.011509	-0.00177103	0.110306
cg13935689	1	9555691	NA	NA	Shore	2.09162e-05	0.200192	0.722982	0.00890806	0.00351677	-0.0159091
cg13948585	1	181451906	CACNA1E	TSS1500	Island	1.44088e-05	0.0385479	0.859898	0.0167907	0.0105557	-0.0146147
cg14023573	8	140971379	TRAPPC9	Body	Island	1.1391e-06	0.282242	0.0986549	0.00752529	-0.00214473	-0.0542907
cg14036830	19	42503207	GRIK5	Body	Island	4.41424e-08	0.090476	0.0917273	0.025483	-0.0100349	-0.164067
cg14063191	9	131486742	ZDHHC12	TSS1500	Island	3.44451e-08	0.599782	0.154474	0.023392	0.00280926	-0.125714
cg14064262	18	10525823	NAPG	TSS200	Shore	2.9995e-06	0.869292	0.106	-0.0134334	-0.000611678	0.099302
cg14138050	9	14693504	ZDHHC21	TSS200	Island	2.62757e-06	0.753659	0.0984674	0.00975511	0.000841766	-0.0732589
cg14209784	10	88729861	AGAP11	TSS1500	Shore	1.18534e-10	0.239506	0.106891	-0.0108347	0.00242894	0.0548276
cg14214321	12	120935059	DYNLL1	Body	Shore	4.53323e-06	0.66613	0.0445191	0.00976218	0.00119033	-0.0919176
cg14236665	10	5853447	GDI2	Body	Shore	7.34872e-06	0.235067	0.803512	0.0138559	0.00478288	0.0163911
cg14313576	3	134339988	KY	Body	OpenSea	9.66357e-06	0.379203	0.0894953	0.00874665	0.00226509	-0.0721971
cg14327393	9	75141633	TMC1	5'UTR	OpenSea	3.82758e-07	0.730741	0.0443968	-0.00924487	0.000801248	0.0776325
cg14343652	7	130789013	FLJ43663	Body	Shore	2.13647e-05	0.0304781	0.69875	-0.0163825	-0.0110272	0.0319844
cg14424579	2	27274309	AGBL5	TSS200	Island	1.57509e-06	0.616136	0.435036	0.0135216	-0.00181959	-0.0465482
cg14515699	12	63328717	PPM1H	TSS200	Island	2.04826e-05	0.289555	0.0198348	-0.00749742	0.0024408	0.0891349
cg14521614	5	5287980	ADAMTS16	Body	OpenSea	3.26277e-06	0.314554	0.00295487	0.00968233	0.00271275	-0.134381
cg14633456	4	113445269	NA	NA	Island	6.18283e-08	0.665648	0.68048	0.0104323	0.00105465	-0.0164963
cg14665690	1	155188904	GBAP1	Body	OpenSea	1.19394e-05	0.125787	0.18829	-0.0114707	0.00525338	0.0739828
cg14674720	2	219827930	NA	NA	Island	1.95165e-08	0.799754	0.00115826	0.0132996	0.000755776	0.16341
cg14676592	16	49910862	NA	NA	Island	3.65254e-09	0.300475	0.289835	0.012952	0.00284178	0.0476902
cg14685006	21	40141569	NCRNA00114	Body	OpenSea	3.77577e-06	0.155747	0.14684	0.0120386	0.00480831	-0.0806809
cg14692377	17	28562685	SLC6A4	1stExon	Island	2.07669e-06	0.687534	0.501907	0.0186532	0.00203992	0.055944
cg14704921	4	53728654	RASL11B	1stExon	Island	6.03059e-14	0.700253	0.686537	0.0222155	0.00133559	0.0229813
cg14742445	22	30195299	ASCC2	Body	OpenSea	2.15418e-05	0.216415	0.0154602	-0.0146967	-0.00560658	0.182366
cg14831838	2	219824308	CDK5R2	TSS200	Island	9.95384e-06	0.370907	0.376964	0.0118547	0.00312899	-0.0507095
cg14848772	6	27099813	HIST1H2AG	TSS1500	Shore	6.44714e-11	0.258339	0.0674455	0.0227935	0.00482377	-0.128803
cg14896463	7	116592956	ST7OT4	TSS1500	Shore	3.01153e-07	0.338446	0.00108604	-0.0122241	0.00292325	0.168106
cg14901671	17	70589079	NA	NA	Island	3.82279e-07	0.714919	0.549516	0.00656995	0.000604346	0.0162635
cg14911690	19	19729395	PBX4	1stExon	Island	1.7512e-12	0.75785	0.765084	0.0211937	0.001107	-0.0176104
cg14919554	5	43018629	NA	NA	Island	7.28723e-07	0.938998	0.579881	0.0225568	-0.000447011	-0.0531148
cg15015996	1	3382565	ARHGEF16	Body	OpenSea	1.92925e-05	0.191855	0.0586811	0.00560514	0.00224437	-0.0536312
cg15022387	19	50096791	PRR12	Body	Island	7.09483e-06	0.235528	0.106278	0.0187735	-0.00646194	-0.144879
cg15091323	2	60780474	BCL11A	1stExon	Shore	4.46141e-06	0.371202	0.703278	0.0135041	0.00341538	0.0238376
cg15103195	7	100797603	AP1S1	TSS200	Island	4.9243e-08	0.111254	0.857093	0.0153858	0.00571839	0.0105428
cg15150064	2	26201094	KIF3C	Body	Shelf	2.24542e-05	0.0318709	0.155375	0.00746598	0.00499745	-0.0539343
cg15163862	10	76721440	MYST4	Body	OpenSea	1.38273e-06	0.850029	0.000706377	-0.0149165	0.000752035	0.227995
cg15190149	19	1257347	MIDN	3'UTR	Island	1.7804e-05	0.980184	0.0316344	0.0138936	-0.000104913	-0.150836
cg15201635	16	68482637	SMPD3	TSS1500	Island	1.26859e-05	0.151313	0.0687273	0.0120337	0.00517893	0.108193
cg15205547	7	23514347	NA	NA	Island	1.83975e-06	0.121757	0.876243	0.0168159	0.0070764	-0.0116161
cg15206473	6	35049613	ANKS1A	Body	OpenSea	1.50196e-05	0.453616	0.290758	-0.0040133	-0.000906962	0.0210175
cg15264020	3	61674210	PTPRG	Body	OpenSea	6.28171e-08	0.949073	0.0715627	0.0133122	-0.000198941	-0.0929199
cg15313320	11	17374127	DKFZp686O24166	Body	Shore	4.13837e-06	0.310793	0.349548	0.015546	0.00444228	0.0672702
cg15355387	3	85007817	CADM2	TSS1500	Shore	1.67765e-06	0.346093	0.0372605	0.0101286	0.00257354	0.0942459
cg15393490	1	207996459	NA	NA	OpenSea	1.39103e-08	0.910112	0.855884	-0.0145006	-0.000362261	-0.00956595
cg15394142	12	66275988	HMGA2	Body	OpenSea	1.14386e-05	0.432903	0.0217526	-0.0168236	-0.00391959	0.190593
cg15442434	6	170210649	NA	NA	OpenSea	2.0454e-05	0.0174401	0.206164	0.0108335	0.00801207	-0.0691817
cg15571405	7	130796167	MKLN1	5'UTR	Shore	2.71861e-07	0.0518876	0.165543	-0.0191349	-0.00932411	0.108626
cg15584989	2	135203925	MGAT5	Body	OpenSea	5.41793e-06	0.577216	0.484319	0.0155359	0.00247074	-0.0509031
cg15629868	1	8319945	NA	NA	OpenSea	4.51957e-08	0.58908	0.53643	-0.00958846	0.00119765	-0.022504
cg15686167	8	6466774	MCPH1	Body	OpenSea	8.87776e-06	0.371487	0.00281433	0.0177181	-0.00464221	-0.260294
cg15751090	2	69534751	NA	NA	Island	6.74903e-06	0.931382	0.343341	0.0136824	0.000339695	-0.0615052
cg15784615	12	6493767	LTBR	Body	Shore	8.10605e-06	0.461301	0.145203	-0.0104389	0.00224215	0.0730754
cg15789607	19	4769690	MIR7-3	TSS1500	OpenSea	1.79284e-08	0.572762	0.00274163	0.0174742	0.00220252	0.196493
cg15822346	6	111408761	SLC16A10	TSS200	Island	1.13538e-07	0.882367	0.388841	0.0126769	-0.000449202	-0.0430208
cg15936446	5	42952369	NA	NA	Island	2.07975e-08	0.188833	0.773576	0.0257728	-0.00763804	-0.0273296
cg16015712	1	53308597	ZYG11A	1stExon	Island	1.80196e-07	0.87427	0.286614	0.0116577	-0.000450055	-0.0498927
cg16038636	17	74138073	FOXJ1	TSS1500	Shore	1.33661e-06	0.218869	0.0239888	-0.0101051	-0.00332066	0.101026
cg16113692	11	22851502	SVIP	TSS200	Shore	1.29777e-05	0.276363	0.12253	0.0137392	0.00448081	-0.104672
cg16187883	14	76448191	TGFB3	TSS200	Shore	1.94833e-05	0.856733	0.0480699	-0.0106654	0.00058846	0.106855
cg16228090	16	3356011	ZNF75A	5'UTR	Island	7.75797e-08	0.323671	0.100393	0.0214952	0.00501735	-0.137725
cg16239218	10	117715809	NA	NA	OpenSea	1.65196e-05	0.434619	0.0623498	0.0156845	-0.00371582	-0.146606
cg16283183	3	45718805	LIMD1	3'UTR	OpenSea	1.02459e-05	0.29853	0.0647845	-0.0134437	0.00413223	0.121237
cg16295725	4	10459219	ZNF518B	TSS200	Island	9.79218e-06	0.74387	0.350804	0.0286258	-0.00275149	-0.12923
cg16343616	6	79940953	HMGN3	Body	Shelf	1.71147e-05	0.0381298	0.800362	0.0153174	-0.00974485	-0.0192891
cg16366686	17	75315837	2016-09-09	5'UTR	OpenSea	2.04838e-05	0.284239	0.00263998	-0.00941327	-0.00309872	0.145862
cg16367511	2	74425523	MTHFD2	TSS200	Island	7.59085e-09	0.514994	0.783876	0.0205871	0.00290688	-0.020081
cg16368750	2	71503548	NA	NA	Island	2.62982e-08	0.906417	0.356484	0.0181516	-0.000483209	-0.0623483
cg16370875	6	80657542	ELOVL4	TSS1500	Island	1.09484e-05	0.707206	0.295192	0.013023	-0.00144791	-0.0664018
cg16396933	10	104954103	NT5C2	TSS1500	Shore	1.94464e-06	0.158187	0.032805	-0.00725425	-0.00278829	0.0696982
cg16402893	1	155226099	SCAMP3	Body	Shore	1.3012e-05	0.50733	0.080838	0.00673731	-0.00133586	-0.0581401
cg16405432	14	95973710	NA	NA	OpenSea	4.14123e-06	0.232052	0.00599939	-0.0113987	-0.00384477	0.147494
cg16471830	16	66400569	CDH5	5'UTR	OpenSea	1.27921e-06	0.0214236	0.0476532	-0.0105908	-0.00656399	0.0924157
cg16480692	16	3355295	ZNF75A	TSS200	Island	1.03733e-12	0.986068	0.00141515	0.0330313	9.6412e-05	-0.297229
cg16509239	11	62212431	AHNAK	Body	Shore	4.59194e-09	0.110844	0.378555	-0.0107687	-0.00368078	0.0332104
cg16512458	1	226069078	TMEM63A	5'UTR	Shore	1.27135e-05	0.0344865	0.00412693	-0.0102791	0.00656127	0.147578
cg16523185	1	2337334	PEX10	Body	Shelf	1.48878e-05	0.725832	0.301946	0.00530942	-0.00056054	-0.0271515
cg16549027	6	43149629	CUL9	TSS1500	Shore	2.66695e-06	0.889275	0.362064	0.00948258	-0.000363194	-0.0391118
cg16566391	15	78631277	CRABP1	TSS1500	Shore	1.94099e-05	0.912197	0.00135692	0.00754995	0.000254364	-0.124673
cg16596691	19	41260294	SNRPA	Body	Shelf	1.67142e-06	0.146702	0.0387945	0.00990002	-0.0038865	-0.0913547
cg16662989	5	172385810	LOC100268168	Body	Island	3.58888e-06	0.541889	0.954514	0.0138504	0.00236069	0.00361994
cg16703882	3	157823479	SHOX2	1stExon	Island	2.38176e-07	0.238679	0.0320743	0.0245521	-0.00716559	-0.215795
cg16704346	3	101280445	RG9MTD1	TSS1500	Shore	1.05028e-05	0.747883	0.0447925	0.0121075	0.00114923	-0.118993
cg16778903	15	72612567	BRUNOL6	TSS200	Island	1.00543e-05	0.929179	0.13372	0.0126823	-0.000331981	-0.0924896
cg16784745	12	54731086	MIR148B	Body	OpenSea	1.44742e-05	0.0861696	0.988757	0.010063	0.00522949	0.000699414
cg16786144	10	134589867	INPP5A	Body	Shelf	1.19976e-05	0.222348	0.437097	0.0110536	0.00402712	-0.041995
cg16792632	14	64761208	ESR2	TSS200	Island	2.29765e-05	0.0245348	0.69525	0.0134065	0.00942688	-0.0266066
cg16822143	10	28011765	MKX	Body	OpenSea	8.37005e-06	0.813169	0.0125669	0.0181957	0.0012543	-0.221022
cg16867657	6	11044877	ELOVL2	TSS1500	Island	5.58892e-16	0.379393	0.000449898	0.0142453	0.00176744	0.119446
cg16909962	1	229406711	RAB4A	TSS200	Island	1.16744e-06	0.529081	0.38729	0.0127635	-0.00212734	-0.0480074
cg16987606	17	72426469	GPRC5C	TSS1500	Shore	2.07964e-08	0.0271272	0.0310891	-0.0111287	0.00559289	0.0895123
cg16997203	11	44972679	TP53I11	TSS200	Island	3.81188e-06	0.197718	0.402471	0.0200333	0.00725715	-0.0772271
cg17009433	9	6645686	GLDC	5'UTR	Island	1.41948e-05	0.78906	0.17173	0.0111264	-0.00089365	0.0752904
cg17015340	13	113470495	ATP11A	Body	Shore	3.72748e-10	0.354056	0.463704	0.027045	0.0049358	-0.064003
cg17110586	19	36454623	NA	NA	Shelf	5.34459e-07	0.0660244	0.104191	0.0128746	0.00609965	0.0883231
cg17117277	19	3822126	ZFR2	Body	Island	4.77838e-08	0.720903	0.60186	0.0245244	0.00202932	-0.048663
cg17192247	2	27194436	MAPRE3	5'UTR	Shore	1.11376e-05	0.101202	0.783613	-0.00608845	0.00297669	0.00812949
cg17243289	18	45458021	SMAD2	TSS1500	Island	1.2147e-06	0.00779026	0.25044	0.0141228	0.0101495	-0.0708527
cg17280346	3	147126703	ZIC1	TSS1500	Shore	1.21486e-06	0.741024	0.848542	0.0165169	0.0014471	0.0137229
cg17285883	1	17896290	ARHGEF10L	5'UTR	OpenSea	1.71484e-06	0.131187	0.0269524	-0.0169677	-0.00693961	0.168108
cg17317859	14	75231455	YLPM1	Body	Shore	1.05453e-05	0.364221	0.0227851	0.0057919	0.00155519	-0.064809
cg17321954	3	120626881	STXBP5L	TSS200	Island	1.33762e-06	0.233192	0.993425	0.0100961	0.00321622	-0.000363509
cg17333973	11	2847019	KCNQ1	Body	OpenSea	7.20814e-06	0.640177	0.106924	-0.00950226	-0.00128588	0.0732551
cg17437852	20	2490109	ZNF343	TSS1500	Shore	2.27372e-05	0.299143	0.541006	0.0131311	-0.00421577	-0.0406645
cg17491987	8	38645408	TACC1	Body	Island	6.10952e-07	0.541449	0.388047	0.0260462	-0.00409035	-0.0949998
cg17621438	5	63461216	RNF180	TSS1500	Shore	6.52732e-12	0.321193	0.639287	-0.0163482	0.00284941	0.0220528
cg17758721	20	2451208	SNRPB	Body	Island	1.78201e-06	0.705694	0.544376	0.0162339	-0.00165474	-0.0436254
cg17980508	1	79085713	IFI44L	TSS1500	OpenSea	8.00515e-08	0.729724	0.00610334	-0.0166999	0.00136314	0.181127
cg18008766	2	38978896	SFRS7	TSS1500	Shore	2.7236e-07	0.127474	0.473891	0.0188626	-0.00717866	-0.0551005
cg18021785	7	133168802	EXOC4	3'UTR	OpenSea	1.95211e-06	0.109779	0.0204078	0.00923206	0.00402801	-0.0965892
cg18039797	15	40509518	BUB1B	Body	OpenSea	1.18574e-05	0.457378	0.379509	-0.00923766	-0.00204321	-0.0396809
cg18127395	7	95433546	DYNC1I1	5'UTR	OpenSea	1.05997e-05	0.976516	0.159973	0.0092792	8.06811e-05	-0.0635461
cg18145080	8	144640397	GSDMD	TSS200	Island	6.7253e-07	0.286949	0.0266046	0.016525	0.00455395	-0.157222
cg18160691	11	68081686	LRP5	Body	Shore	5.17551e-06	0.411947	0.0505297	-0.0111165	-0.0025984	0.102505
cg18175809	3	62355525	FEZF2	3'UTR	Island	1.48561e-06	0.784992	0.144377	0.0160338	0.0011704	0.103348
cg18183406	17	40556833	PTRF	Body	Island	9.01909e-06	0.40572	0.723391	0.0118507	-0.00289032	-0.0201646
cg18240400	10	46168597	ANUBL1	TSS1500	Island	2.35415e-06	0.169666	0.910611	0.00872248	0.00329171	-0.00439515
cg18248911	1	111506294	C1orf103	1stExon	Island	1.11368e-05	0.742598	0.532191	0.0136604	-0.00132906	0.0415246
cg18252964	5	171765285	SH3PXD2B	3'UTR	Shore	2.28782e-05	0.600297	0.0758879	0.0103661	0.00167656	-0.0939412
cg18289141	1	30182218	NA	NA	OpenSea	1.66751e-07	0.182486	0.0956734	-0.0171959	-0.00560135	0.115216
cg18428006	5	177633449	HNRNPAB	Body	Shore	6.46074e-06	0.124577	0.00195221	0.00698659	0.00310616	-0.104834
cg18450254	3	64200005	PRICKLE2	5'UTR	OpenSea	1.30766e-06	0.0105721	0.0178853	-0.021219	-0.014679	0.222617
cg18451114	1	38511677	POU3F1	1stExon	Island	3.33571e-06	0.0489846	0.293098	0.0146049	0.00808029	-0.0703072
cg18452131	7	55209213	EGFR	Body	OpenSea	2.57867e-07	0.00586656	0.0163107	0.0147604	0.010275	-0.146313
cg18468088	6	35490818	NA	NA	OpenSea	1.57227e-13	0.046262	0.128545	0.0286951	0.00922722	0.11499
cg18474885	21	46292084	PTTG1IP	Body	Shore	1.95396e-05	0.634948	0.036956	-0.0158661	-0.00230372	0.167993
cg18515624	18	30049316	FAM59A	Body	Shore	2.50233e-06	0.0276088	0.128248	-0.010398	0.00636313	0.0716327
cg18549036	3	148804541	HLTF	TSS1500	Island	6.61507e-06	0.626048	0.313793	0.0127421	-0.00178951	-0.0608426
cg18565342	10	124714098	C10orf88	TSS200	Island	3.121e-06	0.0884277	0.999406	0.0227798	0.0108428	7.72072e-05
cg18569335	17	40171970	NKIRAS2	TSS200	Island	6.78895e-08	0.106098	0.79359	0.0224301	0.00856547	0.0226109
cg18655369	19	1177575	NA	NA	Shelf	1.39771e-06	0.0538921	0.223551	-0.00708597	-0.00367985	0.0379106
cg18657988	14	89804447	FOXN3	Body	OpenSea	1.36938e-07	0.187511	0.0857977	-0.0086994	-0.00277897	0.0596505
cg18691434	7	99775425	STAG3	TSS200	Island	7.17626e-06	0.87116	0.452595	0.0153359	-0.000719507	-0.0547713
cg18693051	19	1161800	SBNO2	5'UTR	Shore	4.03903e-06	0.254927	0.022607	-0.00848097	-0.0027207	0.090371
cg18725544	7	127994864	PRRT4	Body	Shelf	3.48151e-07	0.770081	0.0440248	0.012472	0.000914233	-0.104497
cg18728264	11	118766491	CXCR5	1stExon	OpenSea	1.77568e-08	0.000454948	0.155428	0.00911393	0.00737141	-0.0476936
cg18809947	6	32154454	PBX2	Body	OpenSea	2.56207e-08	0.532589	0.877771	0.010233	-0.00144612	0.00584409
cg18928900	6	170605493	NA	NA	Island	1.37891e-06	0.0877297	0.380906	0.0090157	0.0041357	0.034637
cg19051213	2	128281334	IWS1	Body	Shelf	1.351e-05	0.720159	0.0203774	0.00612042	-0.000656553	-0.0707514
cg19055803	19	12947164	RTBDN	TSS1500	Shore	4.73623e-07	0.0448649	0.485775	0.0112251	0.00578268	0.032674
cg19060970	19	58038588	ZNF549	TSS200	Island	1.89267e-14	0.301328	0.00599479	0.0202891	0.0031971	-0.141961
cg19185146	2	134880302	NA	NA	Shore	3.08343e-06	0.882362	0.151192	-0.00581077	0.000238246	0.0381375
cg19272238	17	76220898	BIRC5	3'UTR	OpenSea	1.51367e-05	0.186335	0.28987	-0.010651	-0.00425978	0.0559067
cg19283298	13	98090226	RAP2A	Body	Shelf	3.72881e-07	0.810922	0.000791646	0.0201002	-0.0012095	-0.286943
cg19291355	6	44281188	AARS2	TSS200	Island	2.42649e-11	0.298084	0.0600092	0.0250078	0.00473805	-0.141485
cg19302722	2	119067753	NA	NA	OpenSea	2.18953e-05	0.869273	0.151476	0.00790583	-0.000400341	-0.0575775
cg19305718	18	8659964	NA	NA	Island	4.90687e-06	0.568971	8.78578e-05	0.014506	0.0023452	-0.276001
cg19306063	10	135171503	C10orf125	1stExon	Island	1.46188e-05	0.974011	0.00216806	0.0193733	0.000189759	-0.300604
cg19343530	6	28831388	NA	NA	Shore	3.26195e-12	0.664009	0.0469138	0.0298667	0.00223381	-0.169411
cg19358608	20	1924565	NA	NA	Shelf	1.64672e-05	0.0823196	0.821548	-0.0109646	-0.00581232	0.0122884
cg19401340	17	56833197	PPM1E	TSS200	Island	7.35142e-10	0.15192	0.391518	0.0176291	0.00509547	-0.0498438
cg19409163	6	140303164	NA	NA	OpenSea	5.62767e-07	0.240316	0.513784	-0.0139449	-0.00420716	0.0383043
cg19494960	17	78876961	RPTOR	Body	Shelf	5.77201e-07	0.122287	0.000666752	0.0127002	0.00506161	-0.187526
cg19586576	17	42906845	GJC1	5'UTR	Island	2.2035e-05	0.0156922	0.101854	0.0135426	0.0102277	0.112719
cg19635401	6	118873071	C6orf204	Body	OpenSea	1.17819e-05	0.82294	0.912522	-0.00850934	0.000565742	-0.00455854
cg19638175	1	55445834	TMEM61	TSS1500	Shore	4.16225e-07	0.939076	0.0447356	-0.00620804	-0.000119891	0.052234
cg19651003	19	583049	BSG	3'UTR	Shore	2.11516e-05	0.269065	0.034694	0.00802089	-0.00273072	-0.0863901
cg19688118	5	114632615	CCDC112	TSS1500	Shore	5.80436e-06	0.976852	0.551049	0.0127625	-0.000105936	-0.035761
cg19761273	17	80232096	CSNK1D	TSS1500	Shore	8.08549e-07	0.530258	0.193519	-0.0105585	-0.00172573	0.0588862
cg19764555	11	62315119	AHNAK	TSS1500	Shore	3.71948e-06	0.586571	0.00409396	-0.0139648	0.00212544	0.18812
cg19772907	20	45985566	ZMYND8	TSS200	OpenSea	7.20108e-08	0.246988	0.35209	0.0187488	0.00512359	-0.0675122
cg19857461	17	78703048	RPTOR	Body	Shore	1.87274e-06	0.11052	0.231595	0.0160498	0.00697404	-0.0855539
cg19897172	7	135347071	PL-5283	TSS200	Island	2.32016e-07	0.355628	0.609157	0.0141703	0.00323401	0.029335
cg19910382	2	88427561	FABP1	1stExon	OpenSea	1.10374e-05	0.147127	0.166648	0.00723121	0.00312067	-0.0488415
cg19955284	6	31833747	SLC44A4	Body	Shelf	4.02676e-07	0.966641	0.0829878	-0.00788618	8.32169e-05	0.0570739
cg19996355	19	19729375	PBX4	1stExon	Island	1.62527e-13	0.476593	0.0126156	0.0211825	0.00241227	0.140889
cg20012601	4	141013584	MAML3	Body	OpenSea	2.32391e-05	0.640265	0.297504	-0.00765076	0.00110447	0.0405068
cg20049415	20	21377671	NKX2-4	1stExon	Island	1.18969e-05	0.336166	0.930566	0.0226128	0.0064803	0.00961308
cg20063640	20	2635105	NOP56	Body	Shore	8.67668e-06	0.0144556	0.0507768	0.00632932	0.00459572	-0.0598999
cg20094837	13	35515575	NBEA	TSS1500	OpenSea	4.43864e-06	0.613526	0.0190557	-0.00995323	-0.00141933	0.109665
cg20119148	19	18344195	PDE4C	5'UTR	Island	9.16746e-08	0.36814	0.0541837	0.0128544	0.00275273	0.0974122
cg20222376	19	15530606	AKAP8L	TSS1500	Shore	5.97379e-07	0.143721	0.440575	-0.0159062	-0.00600321	0.051764
cg20234855	2	120980555	TMEM185B	Body	Island	2.77666e-07	0.87079	0.791285	0.00604932	0.000244396	-0.00652756
cg20312012	2	97331035	FER1L5	Body	OpenSea	2.32248e-05	0.294229	0.185299	-0.0105092	-0.00341291	0.0708686
cg20315346	15	41523051	CHP	TSS1500	Island	5.59636e-08	0.894025	0.205649	0.0166346	0.000516204	-0.0808386
cg20335152	10	116418504	ABLIM1	Body	OpenSea	6.28754e-07	0.407842	0.00512333	0.0191572	0.00408654	-0.231216
cg20413454	1	53163625	C1orf163	Body	Shore	4.34855e-06	0.505497	0.637981	0.0171694	0.00322622	-0.0373979
cg20438472	3	184293365	EPHB3	Body	Shelf	2.2861e-05	0.608636	0.0210878	-0.00866307	0.00136905	0.102596
cg20442599	6	108479500	NA	NA	Island	7.20507e-07	0.78853	0.660745	0.019033	0.0013215	0.0355042
cg20481655	14	22979162	NA	NA	OpenSea	8.77557e-06	0.723119	0.000983522	0.012571	-0.00130259	-0.20465
cg20484417	12	81763492	PPFIA2	Body	OpenSea	2.44583e-06	0.643861	0.97576	0.0155704	-0.00197302	0.00212729
cg20518446	11	62315034	AHNAK	TSS1500	Island	3.52912e-06	0.771439	0.193926	-0.0192412	0.00155938	0.114949
cg20669012	3	11102341	NA	NA	OpenSea	6.40141e-09	0.00228875	0.182254	-0.0129587	-0.00872579	0.0613887
cg20818778	1	235814145	GNG4	TSS1500	Shore	2.08609e-05	0.141038	0.167612	0.0170388	0.0077389	-0.119002
cg20879085	7	115850441	TES	TSS200	Island	2.10888e-06	0.768155	0.808585	0.0238841	-0.00191544	-0.0258348
cg20938359	12	322250	SLC6A12	5'UTR	OpenSea	9.93015e-06	0.796362	0.356278	-0.00882075	-0.000670074	0.0393984
cg20943084	5	140012769	CD14	1stExon	Shore	1.05859e-06	0.269921	0.017267	-0.0184433	-0.00537579	0.192705
cg21144922	1	109204168	C1orf59	TSS200	Island	2.14841e-05	0.334816	0.00739363	0.00804729	-0.00239109	-0.110833
cg21159778	9	117266918	DFNB31	TSS1500	Island	7.69033e-06	0.864103	0.629022	0.0176569	0.000877423	-0.0406736
cg21182694	3	139062771	MRPS22	TSS200	Shore	3.15147e-08	0.203092	0.636021	0.0168994	0.0049243	-0.0299433
cg21186299	7	100808810	VGF	1stExon	Island	8.93694e-12	0.604094	0.00269327	0.0221083	-0.00202717	-0.197106
cg21239660	17	45006500	GOSR2	Body	OpenSea	1.67033e-05	0.218731	0.0261594	0.0112098	-0.00419316	-0.125591
cg21328810	19	50829227	KCNC3	Body	Island	2.1624e-05	0.441688	0.0900301	0.00878214	0.00208045	0.0757034
cg21411702	6	32028841	TNXB	Body	OpenSea	1.56743e-05	0.0700479	0.0640513	0.00724404	0.00399578	-0.0670691
cg21449360	1	203635628	ATP2B4	5'UTR	OpenSea	1.11431e-05	0.774792	0.0271972	0.0193805	-0.00164264	-0.210812
cg21477033	5	111496357	NCRNA00219	Body	Shore	6.14366e-07	0.0711772	0.594169	0.00964164	0.0045097	-0.021686
cg21483700	19	12943593	RTBDN	Body	Island	1.02293e-05	0.0277005	0.675051	0.0106373	0.00699319	-0.0215883
cg21495349	7	1081344	C7orf50	Body	Shore	1.09141e-05	0.0291649	0.010928	-0.00981276	0.00641282	0.123379
cg21495653	4	13550589	LOC285548	TSS1500	Shore	6.37705e-08	0.65518	0.506039	0.0115992	0.00121332	-0.0296759
cg21572722	6	11044894	ELOVL2	TSS1500	Island	6.33174e-09	0.437421	0.011065	0.00832362	0.00139371	0.0760211
cg21585733	11	107799660	RAB39	Body	Island	8.81345e-06	0.268752	0.810234	0.0101007	0.00327736	-0.011644
cg21586203	7	105650441	FLJ23834	Body	Shore	4.93149e-06	0.88782	0.457585	-0.00867834	-0.000347295	0.0300607
cg21603806	14	73704007	PAPLN	TSS200	Shore	1.02013e-05	0.422156	0.0146378	-0.00728914	-0.00172751	0.0874677
cg21623865	3	9746317	CPNE9	Body	Island	4.20744e-08	0.313742	0.214164	0.0109056	0.00253842	0.0514486
cg21681212	7	55260913	EGFR	Body	OpenSea	1.21735e-05	0.0638512	0.313416	0.00732326	-0.00407615	-0.0361608
cg21710324	1	226069189	TMEM63A	5'UTR	Shore	1.73401e-05	0.0409425	0.00199429	-0.0175193	0.0109926	0.276809
cg21724796	17	8113904	AURKB	TSS200	Island	1.3376e-05	0.48022	0.397936	0.00692072	-0.00146358	-0.0287822
cg21800232	5	79866368	ANKRD34B	TSS200	Island	9.41706e-06	0.513894	0.194408	0.0145522	0.00279105	-0.0913731
cg21834204	12	107381471	MTERFD3	TSS1500	Shore	1.55172e-05	0.0219018	0.112171	-0.00887584	-0.00622349	0.0702824
cg21857098	15	25638137	UBE3A	Body	OpenSea	1.1434e-05	0.428419	0.00227714	0.0183048	-0.00430642	-0.278774
cg21867345	3	44596536	ZNF167	TSS200	Island	1.58092e-05	0.0837744	0.86654	0.014615	0.0076926	0.0121753
cg21877855	1	63989125	ITGB3BP	TSS1500	OpenSea	2.72753e-06	0.4551	0.93033	0.013338	0.00274776	-0.0052715
cg21881330	14	92938068	SLC24A4	Body	OpenSea	5.77312e-07	0.71421	0.0937915	0.0188538	0.00177015	-0.133902
cg21899500	3	51740850	GRM2	TSS1500	Island	5.73161e-06	0.339666	0.810459	0.00859869	0.00235284	-0.0096785
cg21927946	19	4769688	MIR7-3	TSS1500	OpenSea	1.47874e-14	0.376379	0.613999	0.0221753	0.00297179	0.0277738
cg22004069	19	5585648	NA	NA	Shelf	2.7755e-06	0.314613	0.404349	-0.0077155	0.00214427	0.0291617
cg22016649	11	818917	PNPLA2	1stExon	Shore	7.11543e-06	0.529519	0.0121228	-0.00671051	0.00122116	0.0812391
cg22035959	19	951681	ARID3A	Body	Shore	1.62635e-05	0.145679	0.953548	0.00739162	-0.0032712	0.00213767
cg22108374	15	74557527	CCDC33	Body	OpenSea	2.04443e-08	0.0212145	0.341501	0.00997796	0.00523168	0.0350366
cg22134923	11	62314874	AHNAK	TSS1500	Island	1.95004e-05	0.446579	0.0137109	-0.0131949	0.00307396	0.165801
cg22164009	6	14729030	NA	NA	OpenSea	3.02996e-06	0.878686	0.44687	-0.00677209	0.000286159	0.0234415
cg22239213	7	2679726	TTYH3	Body	OpenSea	2.35439e-05	0.829201	0.0276803	0.012016	0.000800977	-0.135911
cg22258538	11	14403163	NA	NA	Shore	4.08954e-07	0.00187751	0.333075	-0.0138336	0.0111428	0.0556293
cg22262152	8	103563698	ODF1	TSS200	OpenSea	1.70958e-05	0.676774	0.139606	0.00800846	0.0010131	-0.0592431
cg22310062	18	19181025	ESCO1	TSS1500	Island	1.7073e-07	0.241281	0.240332	0.0171511	0.00491004	-0.0807572
cg22319147	16	66400599	CDH5	5'UTR	OpenSea	5.74041e-06	0.00118349	0.318325	-0.00935161	-0.00891754	0.0439093
cg22357379	19	1257217	MIDN	Body	Island	1.26942e-05	0.229085	0.00837327	0.0047731	-0.00171906	-0.0627729
cg22454769	2	106015767	FHL2	TSS200	Island	9.25062e-13	0.497595	0.365019	0.0270133	0.00305772	0.067092
cg22546696	15	41952645	MGA	1stExon	Island	1.61285e-05	0.126222	0.287569	0.0352103	0.0163791	0.186372
cg22695729	5	176906134	NA	NA	OpenSea	2.98106e-07	0.422863	0.540723	-0.00870231	0.00174038	0.021788
cg22736354	6	18122719	NHLRC1	1stExon	Island	7.03684e-13	0.788036	0.00853131	0.0162365	-0.000722837	0.11821
cg22737154	2	64631614	NA	NA	OpenSea	3.4177e-09	0.635792	0.317683	-0.0153433	0.00153292	0.0531969
cg22747994	11	64063455	KCNK4	Body	Shelf	1.33572e-05	0.688667	0.132336	0.0139994	0.00167865	-0.104074
cg22777668	12	6881303	LAG3	TSS1500	Shore	3.78634e-06	0.0924646	0.51132	-0.00623389	-0.00295803	0.0188323
cg22820188	1	156086004	LMNA	Body	Shore	5.13427e-06	0.302334	0.924851	-0.0120807	-0.00355207	0.00531697
cg22920873	7	139025153	C7orf55	TSS1500	Island	1.23758e-08	0.773462	0.0309271	0.0205713	0.00130514	-0.162572
cg22949575	17	79948825	ASPSCR1	Body	Shelf	2.83179e-06	0.108873	0.0398877	-0.0134506	-0.00599063	-0.126585
cg23008153	5	63461305	RNF180	TSS1500	Shore	2.61738e-06	0.197347	0.392136	-0.00782999	0.00278654	0.0302866
cg23027580	8	67089513	CRH	Body	Island	8.87718e-09	0.129588	0.116335	0.0107067	0.00355626	0.0605028
cg23045594	2	71503883	NA	NA	Island	1.11624e-06	0.703768	0.560051	0.020867	0.0020954	-0.0527403
cg23091758	11	9025767	NRIP3	TSS200	Island	2.61939e-07	0.561302	0.281387	0.0341873	0.00492483	0.150226
cg23124451	22	39548131	CBX7	Body	Island	2.89915e-07	0.103585	0.631367	-0.0103187	-0.0042086	0.0202322
cg23156348	11	124981869	NA	NA	Shore	9.60411e-11	0.0910068	0.753144	0.0325789	0.0104716	-0.0317501
cg23158811	19	19729732	PBX4	TSS1500	Island	3.10812e-06	0.0133307	0.98581	0.0117535	-0.00819491	0.000951054
cg23197992	5	176514067	FGFR4	1stExon	Island	1.89143e-05	0.0587344	0.84392	0.00962325	0.00560213	-0.00948832
cg23209302	1	1326152	CCNL2	Body	Shelf	4.21924e-07	0.445714	0.00230664	0.0113079	-0.00218346	-0.146603
cg23235223	10	133637528	NA	NA	OpenSea	3.68235e-06	0.351644	0.985332	0.0191206	-0.00498937	-0.00161283
cg23266968	14	105265793	ZBTB42	TSS1500	Shore	1.64957e-07	0.0215409	0.0693812	-0.00840994	-0.00476511	0.0614701
cg23428445	7	124405467	GPR37	1stExon	Island	5.12572e-07	0.161738	0.0979009	0.0112426	0.00403174	0.0784408
cg23431989	17	74137769	FOXJ1	TSS1500	Island	8.87919e-07	0.00988277	0.000341164	-0.0151625	-0.0104025	0.241037
cg23452458	17	45899388	OSBPL7	TSS1500	OpenSea	4.06387e-07	0.365473	0.739458	-0.0113269	-0.00259302	0.0156116
cg23500537	5	140419819	NA	NA	OpenSea	1.43565e-05	0.56792	0.00686769	0.0108289	0.00185915	-0.147153
cg23512231	17	61538215	NA	NA	OpenSea	2.038e-05	0.00528562	0.852747	-0.00960042	-0.00837594	0.00896236
cg23516002	7	128099617	NA	NA	Shelf	1.03946e-05	0.172031	0.898256	-0.0106263	-0.00430318	0.0065806
cg23517605	6	3228365	TUBB2B	TSS1500	Island	4.70936e-07	0.207446	0.0429307	0.00918699	0.00295434	-0.0783944
cg23582919	16	23568380	UBFD1	TSS1500	Shore	7.93541e-09	0.239945	0.694986	0.010718	0.00274259	-0.0149717
cg23606718	2	131513927	FAM123C	5'UTR	Island	1.39849e-12	0.0983041	0.117505	0.0245483	0.00688432	0.106917
cg23684204	15	91497937	RCCD1	TSS200	Shore	9.20021e-06	0.144062	0.684147	0.0197506	0.00850499	-0.0386732
cg23696949	1	183155644	LAMC2	Body	OpenSea	1.12948e-05	0.739201	0.00739693	-0.00750356	-0.000740612	0.0996635
cg23728735	17	3831309	ATP2A3	Body	Shelf	7.10763e-06	0.940045	0.256654	0.0112374	0.00024436	-0.0606969
cg23756251	3	179754521	PEX5L	TSS200	Island	9.40247e-07	0.318969	0.80859	0.0101811	0.00266462	-0.0106051
cg23811789	18	5197462	LOC642597	TSS1500	Shore	8.12293e-07	0.399278	0.790815	0.0214022	0.00470301	-0.024251
cg23813012	1	14026482	PRDM2	TSS1500	Island	5.56412e-09	0.664205	0.716566	0.0216356	0.00201403	0.0276426
cg23837265	10	88730407	C10orf116	3'UTR	Shore	1.62789e-08	0.041496	0.254509	-0.019628	0.00900275	0.0819723
cg23854009	19	58111128	ZNF530	TSS200	Shore	3.48073e-11	0.501032	0.827436	0.0338799	0.0041855	-0.0222334
cg23858197	6	32037421	TNXB	Body	OpenSea	1.21034e-05	0.161405	0.0380069	0.00931173	0.00389985	-0.0954345
cg23904595	11	2908116	CDKN1C	TSS1500	Shore	3.24274e-06	0.196654	0.0634799	-0.0187922	-0.0067691	0.160457
cg23945793	17	6930143	BCL6B	Body	Shelf	7.88772e-06	0.192318	0.109285	0.0192198	-0.00731746	-0.14787
cg23995914	4	10459228	ZNF518B	TSS200	Island	2.57613e-07	0.882017	0.803444	0.0198356	0.000728905	0.0200665
cg23998119	14	77600217	ZDHHC22	Body	OpenSea	3.56892e-06	0.00597028	0.302026	0.0135433	0.0106035	0.0642118
cg24016054	17	46755786	NA	NA	Island	1.48991e-05	0.733023	0.56011	0.0111005	0.00113999	-0.0319822
cg24042452	1	156305664	CCT3	Body	Shelf	1.17383e-05	0.746923	0.0504257	0.0069224	0.000663681	-0.0666987
cg24079702	2	106015771	FHL2	TSS200	Island	1.96986e-09	0.524879	0.536349	0.0210432	0.00277321	0.044264
cg24109116	7	99725975	MBLAC1	3'UTR	Shore	5.8273e-06	0.130038	0.0118847	-0.00964381	0.00420303	0.115871
cg24160066	1	112161864	RAP1A	TSS1500	Shore	7.44965e-06	0.466125	0.203199	-0.00658668	-0.00139325	0.0400446
cg24214260	19	58193221	ZNF551	TSS200	Shore	7.62155e-07	0.644297	0.231437	0.019134	0.00229344	-0.0978854
cg24292016	12	121087689	CABP1	TSS1500	OpenSea	1.13763e-05	0.201866	0.310112	-0.0113501	0.00431372	0.056221
cg24315421	1	208040253	NA	NA	Shore	2.54489e-07	0.533921	0.849115	-0.0174936	0.00269553	-0.0135195
cg24427660	11	818892	PNPLA2	TSS200	Shore	1.19929e-05	0.207256	0.0348105	-0.0074145	0.0027924	0.0772922
cg24467326	10	9646929	NA	NA	OpenSea	2.11593e-05	0.984414	0.020111	0.021808	-0.00013081	-0.259162
cg24670497	1	16068127	TMEM82	TSS1500	Shelf	3.31329e-06	0.88002	0.105371	-0.00815691	0.000342364	0.0607055
cg24724428	6	11044888	ELOVL2	TSS1500	Island	4.87502e-09	0.541025	0.00872806	0.0231774	0.00302585	0.216813
cg24779751	19	36545850	WDR62	5'UTR	Island	1.48489e-05	0.860939	0.136059	-0.0107748	-0.000568037	0.0798003
cg24847541	13	92051154	GPC5	5'UTR	Island	6.01276e-06	0.387106	0.499584	0.0128655	0.00319526	0.0409096
cg24862514	11	44972672	TP53I11	TSS200	Island	3.11893e-06	0.763089	0.325056	0.0193499	0.00161729	-0.086872
cg24865110	17	57407818	YPEL2	TSS1500	Shore	6.34776e-06	0.00517915	0.198262	-0.00747353	0.0061314	0.0455568
cg24888989	3	44803291	KIF15	1stExon	Island	2.31288e-15	0.721952	0.0496064	0.0365526	0.00188875	-0.172751
cg24892069	10	33562205	NRP1	Body	OpenSea	4.74153e-08	0.806917	0.425283	-0.0181635	0.00102773	0.0551142
cg24898914	6	32810706	PSMB8	Body	Shore	2.87368e-06	0.788513	0.00355934	0.0221502	0.0016408	-0.299309
cg24935332	11	31846819	NA	NA	Shore	6.20084e-06	0.0217066	0.861569	0.0139989	0.0093544	-0.0115025
cg24984506	3	135086818	NA	NA	OpenSea	1.55529e-05	0.63855	0.780429	0.0148002	0.00209868	-0.0204352
cg25015277	16	2918180	NA	NA	Island	1.94495e-07	0.55922	0.273618	0.0142315	0.00203579	-0.0627832
cg25090514	5	2038743	NA	NA	Island	9.82781e-10	0.122543	0.0122086	0.0237584	0.00747545	0.201214
cg25090604	13	113470339	ATP11A	Body	Shelf	9.85934e-07	0.448276	0.0221066	0.0163218	-0.00325376	-0.163197
cg25103895	10	64565642	ADO	3'UTR	Island	2.18786e-05	0.244768	0.11452	0.00719751	0.0025848	-0.0577404
cg25139493	1	39957400	BMP8A	1stExon	Island	1.69071e-08	0.707809	0.438856	0.0214996	-0.00179623	-0.0609701
cg25287474	9	14693538	ZDHHC21	TSS200	Island	1.61501e-09	0.0277294	0.566313	0.0173861	0.0079744	-0.033696
cg25298189	19	935259	ARID3A	Body	Shelf	1.29354e-05	0.265888	0.0174024	-0.00781923	-0.00260635	0.0925248
cg25316339	5	79866379	ANKRD34B	TSS200	Island	1.16587e-05	0.651162	0.765792	0.013687	0.00183842	0.0198743
cg25334393	8	145955671	ZNF251	Body	Island	5.03163e-06	0.324401	0.95912	0.0119196	0.00334417	-0.00284779
cg25368116	11	87064843	NA	NA	OpenSea	5.17799e-06	0.305813	0.188582	0.00952671	0.00278215	-0.0587374
cg25384043	15	81295608	MESDC1	1stExon	Island	2.37774e-05	0.0380035	0.972995	0.0113914	-0.00739069	-0.00195677
cg25390506	7	135347085	PL-5283	TSS200	Island	4.88232e-06	0.494235	0.803504	0.0149931	-0.00290955	-0.0173642
cg25427880	10	102322128	NA	NA	Island	4.40039e-11	0.0160506	0.27863	0.0131647	0.00594207	0.0433484
cg25469314	1	48704831	SLC5A9	Body	OpenSea	7.14983e-06	0.330195	0.119202	0.0164784	0.00465203	-0.122669
cg25478614	3	187387866	SST	Body	Shore	4.60371e-10	0.631973	0.622223	0.0126951	0.00120313	-0.0203158
cg25549720	6	32058851	TNXB	Body	Shelf	2.00587e-05	0.000992564	0.674019	0.0145887	0.0151365	-0.0308469
cg25590826	15	74557537	CCDC33	Body	OpenSea	3.08881e-06	0.0330571	0.18945	0.0103668	0.00619683	0.0621526
cg25622481	2	73518365	EGR4	3'UTR	Island	7.9271e-08	0.0692404	0.037347	0.0137656	0.00595672	0.112349
cg25645310	10	116581305	FAM160B1	TSS200	Shore	1.62145e-05	0.963949	0.71688	0.014943	-0.000204251	-0.0269072
cg25711003	3	111522050	PHLDB2	5'UTR	OpenSea	1.93065e-08	0.653676	0.00984757	-0.0141181	-0.00141898	0.136321
cg25743481	3	44803289	KIF15	1stExon	Island	6.59192e-14	0.107981	0.943685	0.0367455	0.00930246	-0.00666466
cg25826226	15	41953061	MGA	5'UTR	Island	1.31955e-07	0.173292	0.282911	0.0364768	0.0120247	0.155353
cg25857695	3	180100722	NA	NA	OpenSea	2.12574e-05	0.684543	0.0191496	0.00992194	-0.00123859	-0.1189
cg25865108	6	45559104	NA	NA	OpenSea	1.52225e-05	0.928959	0.000624062	-0.00822565	-0.000220992	0.143612
cg25941354	2	218989983	CXCR2	TSS1500	OpenSea	3.65656e-06	0.895427	0.140463	-0.00710552	0.000260976	0.0483156
cg26093145	10	133947916	JAKMIP3	Body	Shore	5.43679e-06	0.358959	0.986479	0.0118033	0.00309391	0.000936076
cg26104196	1	159914191	IGSF9	5'UTR	Shore	2.2938e-05	0.98829	0.114409	-0.00555506	2.51512e-05	0.0447008
cg26158959	1	210111162	SYT14	TSS1500	Shore	1.63844e-17	0.00615922	0.0523525	0.0191077	0.00700532	0.0806356
cg26161329	17	56832991	PPM1E	TSS1500	Island	5.59045e-07	0.401354	0.80267	0.0194543	0.00418614	-0.0204256
cg26182780	2	236443439	AGAP1	Body	Shore	5.10763e-06	0.379574	0.122622	0.0127782	0.00319739	-0.0926072
cg26195652	1	43765944	TIE1	TSS1500	OpenSea	1.77838e-06	0.412794	0.0042741	0.00957298	-0.00211891	-0.123788
cg26290632	8	91094847	CALB1	1stExon	OpenSea	2.00926e-06	0.164119	0.794876	0.0137572	0.00522084	0.0159335
cg26337070	2	85999873	ATOH8	Body	OpenSea	1.54369e-05	0.885164	0.772947	-0.0175422	-0.000764102	0.0250593
cg26348226	1	21617442	ECE1	TSS1500	Shore	4.48059e-09	0.00933011	0.00449649	-0.0118477	0.00667222	0.120107
cg26397188	12	65515276	WIF1	TSS200	Island	9.913e-06	0.230116	0.521733	0.0141407	0.0050132	-0.0438104
cg26397500	18	33764857	NA	NA	Shore	2.20904e-05	0.496318	0.501057	0.0136779	0.00286775	-0.0465532
cg26400491	8	144891915	SCRIB	Body	Island	1.91952e-05	0.520997	0.744865	0.015409	0.00302291	0.0251375
cg26522319	1	111506511	C1orf103	1stExon	Island	4.42022e-08	0.718428	0.15552	0.0251329	-0.00209276	0.135991
cg26523338	10	121628615	C10orf119	Body	Shelf	1.21526e-05	0.159801	0.00360468	0.0116444	-0.00489683	-0.16935
cg26546105	7	100168143	NA	NA	Island	3.9722e-07	0.851902	0.445127	0.00985623	-0.000464045	-0.031198
cg26546113	1	182810711	DHX9	5'UTR	Shore	3.02509e-06	0.930164	0.333215	0.0147792	0.000358525	-0.0651377
cg26548187	19	3208840	NCLN	3'UTR	Shore	8.60688e-06	0.0102563	0.464492	0.0064282	0.00490493	0.0225733
cg26559209	10	13570012	NA	NA	Shore	4.59589e-06	0.427049	0.00678512	-0.0152315	0.00342523	0.195088
cg26663772	12	109186856	SSH1	Body	OpenSea	1.88988e-05	0.925125	0.0114035	0.00613792	0.000175974	-0.0790974
cg26734668	19	58111094	ZNF530	TSS200	Shore	1.60447e-08	0.518759	0.36004	0.014094	-0.00202489	-0.0471981
cg26759223	22	46448690	C22orf26	Body	Shore	4.15856e-06	0.157586	0.217555	-0.0159103	-0.00635707	0.090926
cg26781524	16	81272080	BCMO1	TSS1500	OpenSea	7.43976e-06	0.941731	0.848404	-0.00981636	0.000207948	-0.00892699
cg26792755	7	140714919	MRPS33	TSS200	Island	8.1957e-13	0.932267	0.00412885	0.0254738	-0.000359801	-0.203713
cg26833936	1	91303028	NA	NA	Shore	1.55739e-06	0.471424	0.659164	0.0164422	0.00317898	0.0319302
cg26837800	1	56842338	NA	NA	OpenSea	6.02007e-06	0.179701	0.00338759	-0.0105579	0.00407935	0.148913
cg26856080	3	160167746	TRIM59	TSS200	Island	6.38367e-06	0.709877	0.239581	0.0061599	-0.000659053	-0.03431
cg26915924	16	8807043	ABAT	5'UTR	OpenSea	2.35513e-05	0.872381	0.0276735	0.0191242	0.000949218	-0.216325
cg26921969	5	92948217	NA	NA	OpenSea	3.2143e-13	0.722749	0.115444	0.0156773	-0.000903645	0.0662237
cg26942169	6	36566714	SFRS3	Body	OpenSea	9.88203e-06	0.61968	0.0336696	0.00883348	-0.00129084	-0.0917112
cg26946311	16	459792	DECR2	Body	Shore	2.39409e-05	0.0727651	0.174278	0.00692283	0.00387457	-0.0479778
cg26956371	10	124713989	C10orf88	TSS200	Island	2.64876e-09	0.0517463	0.341252	0.0310015	0.0127348	-0.101486
cg26974111	18	12254120	CIDEA	TSS1500	Shore	3.44195e-08	0.5133	0.404556	0.0126894	0.00189928	0.0397776
cg27112370	7	2354484	SNX8	TSS1500	Shore	2.60194e-06	0.918829	0.414984	0.0113264	-0.000317159	-0.0417129
cg27180315	7	75831194	SRRM3	TSS200	Island	1.2806e-05	0.68879	0.0648867	0.00521195	0.000623239	-0.0475617
cg27281285	12	120315368	CIT	TSS1500	Shore	2.1241e-06	0.987121	0.159865	0.00947605	-4.162e-05	-0.0597937
cg27320127	2	47798396	KCNK12	TSS1500	Island	3.45103e-09	0.474807	0.0605022	0.0157711	-0.00238036	0.103446
cg27461196	19	35630106	FXYD1	5'UTR	Shelf	5.16716e-06	0.0420265	0.584659	-0.00546154	0.00319262	-0.0139444
cg27485921	2	46747379	ATP6V1E2	TSS1500	OpenSea	5.91514e-06	0.0866212	0.0347742	-0.00761118	0.00376373	0.0764175
cg27534520	15	99343918	IGF1R	Body	OpenSea	1.73476e-05	0.485265	0.0042858	-0.0116362	-0.00246832	0.169259
cg27541691	17	40811050	TUBG2	TSS1500	Shore	9.60142e-06	0.126493	0.507417	0.0133979	0.00605213	-0.042876
cg27575890	22	36907158	EIF3D	Body	Shelf	3.88814e-06	0.533878	0.301746	-0.00637003	0.00111183	0.0303492
cg27584762	5	86709126	CCNH	TSS1500	Shore	1.47122e-06	0.0697595	0.0134661	-0.00799752	0.00391202	0.0881621
cg27665659	7	100797595	AP1S1	TSS200	Island	1.07993e-10	0.0180013	0.105513	0.0168912	0.00768092	0.0855859
ch.12.1637510F	12	81559782	ACSS3	Body	OpenSea	1.31407e-05	0.226528	0.00240163	0.00843541	-0.00306079	-0.128744
